# Supplementary material for: Regionale verschillen in zorgkosten nader verklaard
Source: Springer Nature journal article supplement (doi:10.1007/s12508-021-00321-y), 2022-03-31
Supplement: MOESM1 [file 20295310]

**Appendix**

| Tabel A1. Descriptieve data (n = 334.721) op basis van ongewogen data. | | | |
| --- | --- | --- | --- |
| Steekproef | | **N** | **(%)** | |
| Geslacht§ | Man | 159.251 | (47,6%) | |
|  | Vrouw | 175.470 | (52,4%) | |
| Migratie achtergrond§ | Nederlandse achtergrond | 294.573 | (88,0%) | |
| Westerse migratie achtergrond | 28.204 | (8,4%) | |
|  | Niet-westerse migratie achtergrond | 11.944 | (3,6%) | |
| Burgerlijke staat§ | Gehuwd/samenwonend | 224.234 | (67,0%) | |
| Nooit gehuwd | 35.899 | (10,7%) | |
|  | Verweduwd | 23.052 | (6,9%) | |
|  | Gescheiden | 31.356 | (9,4%) | |
| Hoogst behaalde opleidingsniveau* | Basisschool | 19.061 | (5,7%) | |
| Lbo/mavo | 102.886 | (30,7%) | |
| Mbo/havo/vwo | 106.341 | (31,8%) | |
| Hbo/wo | 106.433 | (31,8%) | |
| Kwartiel gestandardiseerd huishoudinkomen§ | 0-25% | 42.250 | (12,6%) | |
| 26-50% | 84.243 | (25,2%) | |
| 51-75% | 98.107 | (29,3%) | |
| 76-100% | 110.121 | (32,9%) | |
| Moeite met rondkomen* | Ja, grote moeite | 9.490 | (2,8%) | |
| Ja, enige moeite | 34.273 | (10,2%) | |
| Nee, geen moeite, maar wel op uitgaven letten | 115.299 | (34,4%) | |
| Nee, geen moeite | 175.659 | (52,5%) | |
| Chronische ziekte* | Geen | 203.330 | (60,7%) | |
|  | Eén of meer | 131.391 | (39,3%) | |
| Zelf-ervaren gezondheid* | Zeer (goed) | 247.707 | (74,0%) | |
| Gaat wel, (zeer) slecht | 87.104 | (26,0%) | |
| Risico op angststoornis of depressie* | Geen of laag | 319.533 | (95,5%) | |
| Hoog | 15.188 | (4,5%) | |
| Beweging* | Onvoldoende | 94.343 | (28,2%) | |
|  | Voldoende | 240.378 | (71,8%) | |
| Body Mass Index* | Ondergewicht(<18,5) | 4.200 | (1,3%) | |
|  | Normaal(18,5-25) | 152.321 | (45,5%) | |
|  | Overgewicht(25-30) | 128.977 | (38,5%) | |
|  | Obesitas(30>) | 49.223 | (14,7%) | |
| Alcohol consumptie* | Nooit | 32.663 | (9,8%) | |
| Matig | 275.392 | (82,3%) | |
|  | Overmatig | 26.666 | (8,0%) | |
| Roken* | Nooit gerookt | 135.642 | (40,5%) | |
|  | Ex-roker | 144.994 | (43,3%) | |
|  | Roker | 54.085 | (16,2%) | |
|  |  | **Gemiddelde** | **(sd)** | |
| Leeftijd§ |  | 59,2 | (16,9) | |
| Eenzaamheid* |  | 2,8 | (3,1) | |
| Zelfregie* |  | 26,7 | (5,2) | |

§Register data. *Zelf-gerapporteerde data (gezondheidsmonitor 2016).

| **Tabel A2. Missende data (n=457,150)** | | |
| --- | --- | --- |
| **Variabele** | **N** | **(%)** |
| **Regio*** | 0 | (0) |
| **Leeftijd**§ | 0 | (0) |
| **Geslacht**§ | 0 | (0) |
| **Migratie achtergrond**§ | 0 | (0) |
| **Burgerlijke staat*** | 11.192 | (2,4) |
| **Hoogst behaalde opleidingsniveau*** | 31.422 | (6,9) |
| **Kwartiel gestandaardiseerd huishoudinkomen**§ | 737 | (0,2) |
| **Moeite met rondkomen*** | 35.643 | (7,8) |
| **Beweging*** | 33.488 | (7,3) |
| **Body Mass Index*** | 21.261 | (4,7) |
| **Alcohol consumptie*** | 36.967 | (8,1) |
| **Roken*** | 32.605 | (7,1) |
| **Chronische ziekte*** | 8.808 | (1,9) |
| **Zelf-ervaren gezondheid*** | 5.730 | (1,3) |
| **Risico op een angststoornis of depressie*** | 20.103 | (4,4) |
| **Eenzaamheid*** | 36.364 | (8,0) |
| **Zelfregie*** | 36.612 | (8,0) |

§Register data *Zelf-gerapporteerde data (gezondheidsmonitor 2016).

| Tabel A3. Incidence Rate Ratios per GGD-regio voor totale kosten t.o.v. Zuid-Limburg. Resultaten van Poisson regressie modellen (n= 334,721). | | | | | |
| --- | --- | --- | --- | --- | --- |
| IRR (95%CI) | Model 1 | Model 2 | Model 3a | Model 3b | Model 3c |
| Zuid-Limburg | 1,00 (ref) | 1,00 (ref) | 1,00 (ref) | 1,00 (ref) | 1,00 (ref) |
| Zuid-Holland-Zuid | 0,78 (0,71-0,85) | 0,82 (0,76-0,89) | 0,91 (0,84-0,98) | 0,89 (0,82-0,96) | 0,84 (0,78-0,92) |
| Zeeland | 0,91 (0,84-0,99) | 0,90 (0,83-0,97) | 0,94 (0,87-1,01) | 0,97 (0,90-1,05) | 0,92 (0,85-0,99) |
| Zaanstreek-Waterland | 0,86 (0,80-0,93) | 0,91 (0,85-0,98) | 0,98 (0,92-1,05) | 0,94 (0,88-1,00) | 0,93 (0,87-0,99) |
| West-Brabant | 0,89 (0,82-0,95) | 0,92 (0,86-0,99) | 0,96 (0,89-1,03) | 1,01 (0,94-1,08) | 0,94 (0,87-1,01) |
| Utrecht | 0,79 (0,74-0,84) | 0,92 (0,86-0,97) | 0,99 (0,93-1,05) | 0,96 (0,91-1,02) | 0,94 (0,88-0,99) |
| Twente | 0,89 (0,80-0,99) | 0,96 (0,86-1,07) | 1,06 (0,95-1,18) | 1,00 (0,90-1,11) | 0,97 (0,87-1,08) |
| Rotterdam-Rijnmond | 0,90 (0,84-0,96) | 0,94 (0,88-1,00) | 1,01 (0,95-1,08) | 0,97 (0,91-1,04) | 0,96 (0,90-1,03) |
| Noord- Oost- Gelderland | 0,84 (0,79-0,90) | 0,90 (0,84-0,95) | 0,98 (0,92-1,05) | 0,91 (0,85-0,97) | 0,91 (0,85-0,97) |
| Limburg-Noord | 0,93 (0,86-1,01) | 0,95 (0,87-1,02) | 0,99 (0,92-1,07) | 0,98 (0,91-1,06) | 0,97 (0,90-1,05) |
| Kennemerland | 0,82 (0,76-0,88) | 0,88 (0,82-0,95) | 0,99 (0,92-1,06) | 0,95 (0,88-1,01) | 0,91 (0,85-,098) |
| IJsselland | 0,84 (0,77-0,91) | 0,95 (0,87-1,03) | 1,04 (0,96-1,12) | 0,95 (0,88-1,03) | 0,97 (0,89-1,05) |
| Hollands Noorden | 0,77 (0,72-0,83) | 0,82 (0,77-0,88) | 0,90 (0,84-0,96) | 0,87 (0,81-0,93) | 0,84 (0,79-0,90) |
| Hollands Midden | 0,80 (0,75-0,86) | 0,89 (0,83-0,95) | 0,97 (0,91-1,04) | 0,90 (0,84-0,96) | 0,90 (0,84-0,96) |
| Hart voor Brabant | 0,85 (0,76-0,94) | 0,90 (0,81-1,00) | 0,95 (0,86-1,05) | 0,97 (0,88-1,08) | 0,92 (0,83-1,02) |
| Haaglanden | 0,90 (0,83-0,97) | 0,98 (0,91-1,05) | 1,05 (0,98-1,13) | 0,99 (0,92-1,06) | 0,98 (0,91-1,06) |
| Groningen | 0,81 (0,75-0,88) | 0,88 (0,82-0,96) | 0,96 (0,89-1,04) | 0,89 (0,83-0,96) | 0,92 (0,85-0,99) |
| Gooi en Vechtstreek | 0,85 (0,77-0,94) | 0,89 (0,81-0,98) | 0,98 (0,89-1,07) | 0,96 (0,87-1,05) | 0,92 (0,83-1,01) |
| Gelderland-Zuid | 0,87 (0,79-0,96) | 0,97 (0,88-1,07) | 1,05 (0,95-1,06) | 1,01 (0,92-1,12) | 0,98 (0,89-1,08) |
| Gelderland-Midden | 0,82 (0,76-0,90) | 0,90 (0,83-0,97) | 0,98 (0,90-1,06) | 0,91 (0,84-0,99) | 0,91 (0,84-0,98) |
| Friesland | 0,85 (0,78-0,91) | 0,87 (0,80-0,94) | 0,98 (0,91-1,06) | 0,91 (0,85-0,99) | 0,89 (0,83-0,97) |
| Flevoland | 0,78 (0,69-0,87) | 0,89 (0,80-0,99) | 0,95 (0,85-1,06) | 0,90 (0,81-1,00) | 0,90 (0,81-1,01) |
| Drenthe | 0,85 (0,77-0,95) | 0,86 (0,78-0,96) | 0,96 (0,87-1,06) | 0,92 (0,83-1,02) | 0,89 (0,80-0,99) |
| Brabant-Zuidoost | 0,87 (0,81-0,93) | 0,92 (0,86-0,99) | 0,95 (0,89-1,02) | 1,00 (0,93-1,06) | 0,94 (0,88-0,99) |
| Amsterdam | 0,86 (0,79-0,94) | 0,99 (0,91-1,09) | 1,10 (1,01-1,21) | 1,06 (0,97-1,15) | 1,03 (0,94-1,12) |

| **Vervolg Tabel A3.** | | | | | |
| --- | --- | --- | --- | --- | --- |
| IRR (95%CI) | Model 4 | Model 5a | Model 5b | Model 5c | Model 6 |
| Zuid-Limburg | 1,00 (ref) | 1,00 (ref) | 1,00 (ref) | 1,00 (ref) | 1,00 (ref) |
| Zuid-Holland-Zuid | 0,93 (0,86-1,01) | 0,93 (0,86-1,01) | 0,93 (0,86-1,01) | 0,93 (0,86-1,00) | 0,92 (0,86-0,99) |
| Zeeland | 0,99 (0,92-1,07) | 1,02 (0,95-1,10) | 1,00 (0,93-1,07) | 0,99 (0,92-1,06) | 1,02 (0,95-1,09) |
| Zaanstreek-Waterland | 0,98 (0,92-1,05) | 1,00 (0,93-1,07) | 0,98 (0,92-1,05) | 0,99 (0,93-1,06) | 1,00 (0,93-1,06) |
| West-Brabant | 1,03 (0,96-1,10) | 1,04 (0,97-1,12) | 1,03 (0,96-1,10) | 1,02 (0,95-1,10) | 1,04 (0,97-1,11) |
| Utrecht | 1,00 (0,95-1,06) | 1,02 (0,96-1,08) | 1,00 (0,94-1,06) | 1,01 (0,95-1,07) | 1,01 (0,96-1,08) |
| Twente | 1,06 (0,95-1,18) | 1,09 (0,98-1,21) | 1,06 (0,95-1,17) | 1,06 (0,96-1,18) | 1,08 (0,97-1,20) |
| Rotterdam-Rijnmond | 1,02 (0,96-1,08) | 1,02 (0,96-1,09) | 1,02 (0,95-1,08) | 1,02 (0,96-1,09) | 1,02 (0,96-1,09) |
| Noord- Oost- Gelderland | 0,97 (0,91-1,03) | 0,99 (0,93-1,05) | 0,96 (0,91-1,03) | 0,97 (0,91-1,03) | 0,98 (0,92-1,04) |
| Limburg-Noord | 1,01 (0,93-1,09) | 1,02 (0,95-1,11) | 1,01 (0,93-1,09) | 1,01 (0,94-1,09) | 1,03 (0,95-1,11) |
| Kennemerland | 1,01 (0,94-1,08) | 1,03 (0,96-1,10) | 1,00 (0,94-1,08) | 1,02 (0,95-1,09) | 1,03 (0,96-1,10) |
| IJsselland | 1,02 (0,94-1,10) | 1,04 (0,96-1,12) | 1,01 (0,94-1,09) | 1,01 (0,94-1,09) | 1,02 (0,95-1,10) |
| Hollands Noorden | 0,91 (0,85-0,97) | 0,93 (0,87-0,99) | 0,91 (0,85-0,97) | 0,92 (0,86-0,98) | 0,93 (0,87-0,99) |
| Hollands Midden | 0,96 (0,90-1,02) | 0,98 (0,92-1,04) | 0,95 (0,89-1,02) | 0,94 (0,88-1,00) | 0,95 (0,89-1,01) |
| Hart voor Brabant | 1,00 (0,90-1,11) | 1,02 (0,92-1,13) | 1,00 (0,90-1,10) | 1,00 (0,90-1,11) | 1,02 (0,92-1,13) |
| Haaglanden | 1,04 (0,96-1,12) | 1,05 (0,98-1,13) | 1,03 (0,96-1,11) | 1,05 (0,97-1,13) | 1,06 (0,98-1,14) |
| Groningen | 0,96 (0,89-1,04) | 0,98 (0,91-1,05) | 0,96 (0,89-1,03) | 0,97 (0,90-1,05) | 0,98 (0,91-1,06) |
| Gooi en Vechtstreek | 1,00 (0,91-1,10) | 1,00 (0,91-1,10) | 1,00 (0,91-1,09) | 1,01 (0,92-1,11) | 1,00 (0,91-1,10) |
| Gelderland-Zuid | 1,06 (0,96-1,17) | 1,07 (0,97-1,18) | 1,06 (0,96-1,16) | 1,06 (0,96-1,17) | 1,06 (0,96-1,17) |
| Gelderland-Midden | 0,97 (0,89-1,04) | 0,98 (0,91-1,06) | 0,96 (0,89-1,03) | 0,97 (0,89-1,04) | 0,97 (0,90-1,05) |
| Friesland | 0,99 (0,91-1,06) | 1,00 (0,93-1,08) | 0,98 (0,91-1,06) | 0,99 (0,92-1,06) | 1,00 (0,93-1,07) |
| Flevoland | 0,94 (0,85-1,05) | 0,95 (0,85-1,05) | 0,94 (0,85-1,04) | 0,95 (0,85-1,06) | 0,96 (0,86-1,06) |
| Drenthe | 0,98 (0,89-1,08) | 0,99 (0,89-1,09) | 0,98 (0,88-1,08) | 0,99 (0,89-1,09) | 0,99 (0,89-1,09) |
| Brabant-Zuidoost | 1,01 (0,95-1,17) | 1,03 (0,97-1,10) | 1,01 (0,94-1,07) | 1,00 (0,94-1,07) | 1,02 (0,96-1,09) |
| Amsterdam | 1,12 (1,03-1,22) | 1,14 (1,04-1,25) | 1,12 (1,02-1,22) | 1,13 (1,04-1,24) | 1,14 (1,04-1,25) |

IRR: Incidence Rate Ratio. CI: confidence interval. Model 1: regio. Model 2: regio, demografie, en SES. Model 3a: regio, demografie, SES, leefstijl, eenzaamheid, zelfregie, en zelf-ervaren gezondheid. Model 3b: regio, demografie, SES en chronische ziekte. Model 3c: regio, demografie, SES en risico op angststoornis of depressie. Model 4: regio, demografie, SES, zelf-ervaren gezondheid, chronische ziekte en risico op angststoornis of depressie. Model 5a: regio, demografie, SES, zelf-ervaren gezondheid, chronische ziekte, risico op angststoornis of depressie, en leefstijl. Model 5b: regio, demografie, SES, zelf-ervaren gezondheid, chronische ziekte, risico op angststoornis of depressie en eenzaamheid. Model 5c: regio, demografie, SES, zelf-ervaren gezondheid, chronische ziekte, risico op angststoornis of depressie en zelfregie. Model 6 regio, demografie, SES, zelf-ervaren gezondheid, chronische ziekte, risico op angststoornis of depressie, leefstijl, eenzaamheid, en zelfregie. Register data: leeftijd, geslacht, migratie achtergrond en huishoudinkomen. Zelf-gerapporteerde data: burgerlijke staat, opleidingsniveau, moeite met rondkomen, zelf-ervaren gezondheid, chronische ziekte, risico op een angststoornis of depressie, leefstijl, eenzaamheid en zelfregie.

|  | | | | | | | | | | | | | | | | | | | | | |
| --- | --- | --- | --- | --- | --- | --- | --- | --- | --- | --- | --- | --- | --- | --- | --- | --- | --- | --- | --- | --- | --- |
|  |  | |  | |  | |  | |  | |  | |  | |  | |  | |  | | |
|  |  |  |  |  |  |  |  |  |  |  |  |  |  |  |  |  |  |  |  |  |
|  |  | |  | |  | |  | |  | |  | |  | |  | |  | |  | |
|  |  |  |  |  |  |  |  |  |  |  |  |  |  |  |  |  |  |  |  |  |
|  |  |  |  |  |  |  |  |  |  |  |  |  |  |  |  |  |  |  |  |  |
|  |  |  |  |  |  |  |  |  |  |  |  |  |  |  |  |  |  |  |  |  |
|  |  |  |  |  |  |  |  |  |  |  |  |  |  |  |  |  |  |  |  |  |
|  |  |  |  |  |  |  |  |  |  |  |  |  |  |  |  |  |  |  |  |  |
|  |  |  |  |  |  |  |  |  |  |  |  |  |  |  |  |  |  |  |  |  |
|  |  |  |  |  |  |  |  |  |  |  |  |  |  |  |  |  |  |  |  |  |
|  |  |  |  |  |  |  |  |  |  |  |  |  |  |  |  |  |  |  |  |  |
|  |  |  |  |  |  |  |  |  |  |  |  |  |  |  |  |  |  |  |  |  |
|  |  |  |  |  |  |  |  |  |  |  |  |  |  |  |  |  |  |  |  |  |
|  |  |  |  |  |  |  |  |  |  |  |  |  |  |  |  |  |  |  |  |  |
|  |  |  |  |  |  |  |  |  |  |  |  |  |  |  |  |  |  |  |  |  |
|  |  |  |  |  |  |  |  |  |  |  |  |  |  |  |  |  |  |  |  |  |
|  |  |  |  |  |  |  |  |  |  |  |  |  |  |  |  |  |  |  |  |  |
|  |  |  |  |  |  |  |  |  |  |  |  |  |  |  |  |  |  |  |  |  |
|  |  |  |  |  |  |  |  |  |  |  |  |  |  |  |  |  |  |  |  |  |
|  |  |  |  |  |  |  |  |  |  |  |  |  |  |  |  |  |  |  |  |  |
|  |  |  |  |  |  |  |  |  |  |  |  |  |  |  |  |  |  |  |  |  |
|  |  |  |  |  |  |  |  |  |  |  |  |  |  |  |  |  |  |  |  |  |
|  |  |  |  |  |  |  |  |  |  |  |  |  |  |  |  |  |  |  |  |  |
|  |  |  |  |  |  |  |  |  |  |  |  |  |  |  |  |  |  |  |  |  |
|  |  |  |  |  |  |  |  |  |  |  |  |  |  |  |  |  |  |  |  |  |
|  |  |  |  |  |  |  |  |  |  |  |  |  |  |  |  |  |  |  |  |  |
|  |  |  |  |  |  |  |  |  |  |  |  |  |  |  |  |  |  |  |  |  |

| Tabel A4. Incidence Rate Ratios per GGD-regio voor huisarts consult kosten t.o.v. Zuid-Limburg. Resultaten van Zero-inflated negative binomial regressie modellen (n= 334,721). | | | | | | | | | | | | | |
| --- | --- | --- | --- | --- | --- | --- | --- | --- | --- | --- | --- | --- | --- |
| IRR (95%CI) | Model 1 | | Model 2 | | | Model 3a | | | Model 3b | | Model 3c | | |
|  |  | Infl. |  | | Infl. |  | | Infl. |  | Infl. |  | Infl. | |
| Zuid-Limburg | 1,00 (ref) | 1,00 (ref) | 1,00 (ref) | 1,00 (ref) | | 1,00 (ref) | 1,00 (ref) | | 1,00 (ref) | 1,00 (ref) | 1,00 (ref) | | 1,00 (ref) |
| Zuid-Holland-Zuid | 0,82  (0,79-0,86) | 1,14  (1,02-1,28) | 0,85  (0,82-0,89) | | 1,13  (1,01-1,27) | 0,89  (0,85-0,92) | | 1,10  (0,98-1,23) | 0,87  (0,84-0,91) | 1,10  (0,98-1,23) | 0,87  (0,83-0,91) | 1,12  (1,00-1,25) | |
| Zeeland | 0,81  (0,77-0,84) | 1,18  (1,07-1,31) | 0,81  (0,78-0,84) | | 1,22  (1,10-1,35) | 0,83  (0,80-0,86) | | 1,21  (1,09-1,35) | 0,83  (0,08-0,86) | 1,19  (1,07-1,32) | 0,82  (0,79-0,85) | 1,22  (1,10-1,35) | |
| Zaanstreek-Waterland | 0,84  (0,81-0,87) | 1,08  (0,99-1,19) | 0,86  (0,83-0,89) | | 1,10  (1,00-1,21) | 0,89  (0,86-0,92) | | 1,08  (0,98-1,18) | 0,87  (0,84-0,90) | 1,10  (1,00-1,20) | 0,87  (0,84-0,90) | 1,10  (1,00-1,21) | |
| West-Brabant | 0,76  (0,74-0,79) | 1,13  (1,02-1,24) | 0,80  (0,83-0,89) | | 1,13  (1,02-1,24) | 0,81  (0,78-0,84) | | 1,12  (1,02-1,24) | 0,82  (0,79-0,84) | 1,09  (0,99-1,20) | 0,80  (0,78-0,83) | 1,13  (1,02-1,24) | |
| Utrecht | 0,79  (0,77-0,81) | 1,29  (1,20-1,39) | 0,85  (0,83-0,88) | | 1,21  (1,12-1,30) | 0,87  (0,85-0,90) | | 1,18  (1,01-1,28) | 0,86  (0,84-0,89) | 1,19  (1,10-1,28) | 0,86  (0,84-0,88) | 1,20  (1,12-1,30) | |
| Twente | 0,74  (0,71-0,77) | 1,50  (1,37-1,65) | 0,78  (0,75-0,81) | | 1,46  (1,33-1,61) | 0,81  (0,78-0,84) | | 1,42  (1,30-1,57) | 0,79  (0,76-0,82) | 1,45  (1,32-1,60) | 0,79  (0,76-0,82) | 1,47  (1,34-1,62) | |
| Rotterdam-Rijnmond | 0,87  (0,84-0,90) | 2,11  (1,97-2,27) | 0,87  (0,85-0,90) | | 2,21  (2,05-2,38) | 0,90  (0,87-0,92) | | 2,18  (2,03-2,35) | 0,88  (0,86-0,91) | 2,22  (2,06-2,40) | 0,88  (0,86-0,91) | 2,20  (2,05-2,37) | |
| Noord- Oost- Gelderland | 0,76  (0,74-0,79) | 1,25  (1,14-1,36) | 0,80  (0,77-0,82) | | 1,24  (1,14-1,35) | 0,82  (0,80-0,85) | | 1,21  (1,11-1,31) | 0,80  (0,77-0,82) | 1,24  (1,14-1,36) | 0,80  (0,77-0,82) | 1,24  (1,14-1,35) | |
| Limburg-Noord | 0,88  (0,85-0,91) | 1,04  (0,96-1,14) | 0,89  (0,87-0,92) | | 1,05  (0,96-1,15) | 0,92  (0,89-0,94) | | 1,04  (0,95-1,13) | 0,91  (0,88-0,93) | 1,04  (0,95-1,14) | 0,90  (0,88-0,93) | 1,05  (0,96-1,15) | |
| Kennemerland | 0,79  (0,76-0,82) | 1,08  (0,99-1,18) | 0,83  (0,81-0,86) | | 1,07  (0,98-1,17) | 0,87  (0,84-0,90) | | 1,04  (0,95-1,14) | 0,85  (0,82-0,88) | 1,05  (0,96-1,15) | 0,84  (0,81-0,87) | 1,07  (0,97-1,17) | |
| IJsselland | 0,74  (0,71-0,78) | 1,28  (1,15-1,43) | 0,82  (0,78-0,85) | | 1,20  (1,08-1,34) | 0,84  (0,81-0,88) | | 1,18  (1,06-1,32) | 0,82  (0,78-0,85) | 1,21  (1,09-1,35) | 0,82  (0,79-0,86) | 1,20  (1,08-1,34) | |
| Hollands Noorden | 0,78  (0,75-0,81) | 1,25  (1,14-1,36) | 0,80  (0,77-0,83) | | 1,25  (1,15-1,36) | 0,83  (0,80-0,85) | | 1,22  (1,12-1,33) | 0,81  (0,79-0,84) | 1,22  (1,12-1,34) | 0,81  (0,78-0,84) | 1,25  (1,14-1,36) | |
| Hollands Midden | 0,79  (0,77-0,82) | 1,22  (1,12-1,32) | 0,83  (0,81-0,86) | | 1,17  (1,08-1,27) | 0,91  (0,88-0,94) | | 1,14  (1,05-1,23) | 0,83  (0,81-0,86) | 1,18  (1,09-1,28) | 0,84  (0,81-0,86) | 1,17  (1,08-1,27) | |
| Hart voor Brabant | 0,85  (0,82-0,88) | 1,10  (1,01-1,19) | 0,89  (0,86-0,91) | | 1,07  (0,98-1,16) | 0,88  (0,85-0,91) | | 1,06  (0,97-1,15) | 0,91  (0,88-0,94) | 1,04  (0,96-1,13) | 0,89  (0,87-0,92) | 1,07  (0,98-1,16) | |
| Haaglanden | 0,87  (0,83-0,90) | 1,11  (1,11-1,13) | 0,85  (0,82-0,89) | | 1,12  (1,11-1,13) | 0,90  (0,87-0,93) | | 1,12  (1,11-1,13) | 0,86  (0,83-0,89) | 1,12  (1,12-1,13) | 0,85  (0,82-0,88) | 1,12  (1,11-1,13) | |
| Groningen | 0,85  (0,82-0,88) | 1,38  (1,26-1,52) | 0,88  (0,85-0,92) | | 1,31  (1,19-1,43) | 0,90  (0,86-0,94) | | 1,28  (1,17-1,40) | 0,88  (0,85-0,92) | 1,32  (1,20-1,45) | 0,90  (0,86-0,93) | 1,29  (1,18-1,42) | |
| Gooi en Vechtstreek | 0,84  (0,81-0,88) | 1,10  (0,97-1,25) | 0,88  0,84-0,92) | | 1,10  (0,97-1,25) | 0,84  (0,81-0,88) | | 1,07  (0,95-1,21) | 0,90  (0,86-0,94) | 1,07  (0,95-1,21) | 0,88  (0,84-0,92) | 1,10  (0,97-1,24) | |
| Gelderland-Zuid | 0,85  (0,82-0,88) | 1,25  (1,14-1,37) | 0,89  (0,86-0,92) | | 1,19  (1,08-1,30) | 0,91  (0,88-0,94) | | 1,16  (1,06-1,27) | 0,90  (0,87-0,93) | 1,17  (1,07-1,28) | 0,89  (0,86-0,92) | 1,19  (1,09-1,30) | |
| Gelderland-Midden | 0,83  (0,79-0,87) | 1,33  (1,191-,48) | 0,86  (0,83-0,90) | | 1,29  (1,16-1,44) | 0,88  (0,85-0,92) | | 1,26  (1,13-1,40) | 0,86  (0,83-0,90) | 1,29  (1,16-1,44) | 0,86  (0,83-0,90) | 1,29  (1,16-1,44) | |
| Friesland | 0,80  (0,77-0,83) | 1,31  (1,20-1,44) | 0,81  (0,79-0,84) | | 1,32  (1,21-1,44) | 0,84  (0,82-0,87) | | 1,28  (1,17-1,40) | 0,82  (0,80-0,85) | 1,30  (1,19-1,42) | 0,82  (0,79-0,85) | 1,31  (1,20-1,43) | |
| Flevoland | 0,84  (0,78-0,91) | 0,98  (0,80-1,19) | 0,92  (0,86-0,99) | | 0,93  (0,76-1,15) | 0,95  (0,89-1,02) | | 0,91  (0,75-1,12) | 0,92  (0,86-0,99) | 0,93  (0,76-1,15) | 0,93  (0,86-0,99) | 0,93  (0,76-1,15) | |
| Drenthe | 0,83  (0,79-0,87) | 1,11  (0,98-1,25) | 0,85  (0,81-0,89) | | 1,14  (1,00-1,29) | 0,88  (0,85-0,93) | | 1,10  (0,97-1,25) | 0,87  (0,83-0,91) | 1,12  (0,99-1,26) | 0,86  (0,82-0,90) | 1,13  (1,00-1,28) | |
| Brabant-Zuidoost | 0,79  (0,77-0,82) | 1,21  (1,11-1,32) | 0,82  (0,80-0,85) | | 1,18  (1,08-1,28) | 0,84  (0,82-0,87) | | 1,18  (1,09-1,29) | 0,84  (0,82-0,87) | 1,15  (1,06-1,25) | 0,83  (0,81-0,86) | 1,18  (1,09-1,29) | |
| Amsterdam | 0,79  (0,76-0,82) | 1,30  (1,18-1,43) | 0,83  (0,80-0,86) | | 1,24  (1,12-1,36) | 0,87  (0,84-0,90) | | 1,19  (1,08-1,32) | 0,86  (0,82-0,89) | 1,21  (1,10-1,33) | 0,85  (0,82-0,88) | 1,22  (1,11-1,35) | |

| Vervolg Tabel A4. | | | | | | | | | | | | |
| --- | --- | --- | --- | --- | --- | --- | --- | --- | --- | --- | --- | --- |
| IRR | Model 4 | | Model 5a | | | Model 5b | | | Model 5c | | Model 6 | |
| IRR (95%CI) |  | Infl. |  | | Infl. |  | | Infl. |  | Infl. |  | Infl. |
| Zuid-Limburg | 1,00 (ref) | 1,00 (ref) | 1,00 (ref) | 1,00 (ref) | | 1,00 (ref) | 1,00 (ref) | | 1,00 (ref) | 1,00 (ref) | 1,00 (ref) | 1,00 (ref) |
| Zuid-Holland-Zuid | 0,90  (0,86-0,93) | 1,08  (0,97-1,21) | 0,90  (0,86-0,93) | | 1,08  (0,97-1,21) | 0,90  (0,86-0,94) | | 1,08  (0,97-1,21) | 0,90  (0,86-0,93) | 1,08  (0,97-1,21) | 0,90  (0,86-0,93) | 1,09  (0,97-1,22) |
| Zeeland | 0,84  (0,81-0,87) | 1,19  (1,07-1,32) | 0,84  (0,81-0,87) | | 1,19  (1,08-1,33) | 0,84  (0,81-0,87) | | 1,19  (1,07-1,32) | 0,83  (0,80-0,86) | 1,20  (1,08-1,33) | 0,84  (0,80-0,87) | 1,20  (1,08-1,33) |
| Zaanstreek-Waterland | 0,89  (0,86-0,92) | 1,08  (0,99-1,19) | 0,89  (0,87-0,92) | | 1,09  (0,99-1,19) | 0,90  (0,87-0,93) | | 1,08  (0,99-1,19) | 0,89  (0,87-0,92) | 1,08  (0,99-1,19) | 0,90  (0,87-0,93) | 1,09  (0,99-1,19) |
| West-Brabant | 0,82  (0,79-0,85) | 1,10  (0,99-1,21) | 0,82  (0,79-0,85) | | 1,10  (1,00-1,21) | 0,82  (0,79-0,85) | | 1,10  (0,99-1,21) | 0,82  (0,79-0,85) | 1,10  (1,00-1,21) | 0,82  (0,79-0,85) | 1,10  (1,00-1,21) |
| Utrecht | 0,88  (0,85-0,90) | 1,18  (1,09-1,27) | 0,88  (0,86-0,90) | | 1,18  (1,10-1,27) | 0,88  (0,86-0,90) | | 1,18  (1,09-1,27) | 0,88  (0,86-0,90) | 1,18  (1,09-1,27) | 0,88  (0,86-0,91) | 1,18  (1,10-1,27) |
| Twente | 0,81  (0,78-0,84) | 1,44  (1,31-1,59) | 0,81  (0,79-0,84) | | 1,45  (1,32-1,60) | 0,81  (0,78-0,84) | | 1,44  (1,31-1,59) | 0,81  (0,78-0,84) | 1,44  (1,31-1,59) | 0,81  (0,79-0,84) | 1,46  (1,32-1,60) |
| Rotterdam-Rijnmond | 0,90  (0,88-0,93) | 2,20  (2,04-2,37) | 0,90  (0,88-0,93) | | 2,21  (2,05-2,38) | 0,90  (0,88-0,93) | | 2,20  (2,04-2,37) | 0,90  (0,88-0,93) | 2,20  (2,04-2,37) | 0,90  (0,88-0,93) | 2,21  (2,05-2,39) |
| Noord- Oost- Gelderland | 0,81  (0,79-0,84) | 1,23  (1,13-1,34) | 0,82  (0,79-0,84) | | 1,24  (1,14-1,35) | 0,82  (0,79-0,84) | | 1,23  (1,13-1,34) | 0,81  (0,79-0,83) | 1,23  (1,13-1,34) | 0,81  (0,79-0,84) | 1,24  (1,14-1,35) |
| Limburg-Noord | 0,92  (0,90-0,95) | 1,03  (0,95-1,13) | 0,92  (0,90-0,95) | | 1,04  (0,95-1,13) | 0,92  (0,90-0,95) | | 1,03  (0,95-1,13) | 0,92  (0,90-0,95) | 1,03  (0,95-1,13) | 0,92  (0,90-0,95) | 1,04  (0,95-1,14) |
| Kennemerland | 0,87  (0,84-0,90) | 1,04  (0,95-1,13) | 0,87  (0,84-0,90) | | 1,04  (0,95-1,14) | 0,87  (0,85-0,90) | | 1,04  (0,95-1,13) | 0,87  (0,85-0,90) | 1,03  (0,95-1,13) | 0,88  (0,85-0,90) | 1,04  (0,95-1,14) |
| IJsselland | 0,83  (0,80-0,87) | 1,20  (1,08-1,34) | 0,84  (0,80-0,87) | | 1,21  (1,09-1,35) | 0,84  (0,80-0,87) | | 1,20  (1,08-1,34) | 0,83  (0,80-0,87) | 1,20  (1,08-1,34) | 0,84  (0,80-0,87) | 1,22  (1,09-1,36) |
| Hollands Noorden | 0,83  (0,81-0,86) | 1,21  (1,11-1,33) | 0,83  (0,81-0,86) | | 1,22  (1,12-1,33) | 0,83  (0,81-0,86) | | 1,21  (1,11-1,33) | 0,84  (0,81-0,86) | 1,21  (1,11-1,32) | 0,84  (0,81-0,87) | 1,22  (1,12-1,33) |
| Hollands Midden | 0,85  (0,83-0,88) | 1,16  (1,07-1,26) | 0,86  (0,83-0,88) | | 1,17  (1,08-1,26) | 0,85  (0,83-0,88) | | 1,16  (1,07-1,26) | 0,85  (0,82-0,87) | 1,16  (1,07-1,26) | 0,85  (0,83-0,87) | 1,17  (1,08-1,27) |
| Hart voor Brabant | 0,92  (0,89-0,94) | 1,04  (0,96-1,13) | 0,92  (0,89-0,95) | | 1,05  (0,96-1,14) | 0,92  (0,89-0,95) | | 1,04  (0,96-1,13) | 0,92  (0,89-0,94) | 1,04  (0,96-1,13) | 0,92  (0,90-0,95) | 1,05  (0,97-1,14) |
| Haaglanden | 0,87  (0,84-0,90) | 1,12  (0,84-0,90) | 0,87  (0,84-0,90) | | 1,12  (1,12-1,13) | 0,87  (0,84-0,91) | | 1,12  (1,12-1,13) | 0,87  (0,84-0,90) | 1,12  (1,11-1,13) | 0,87  (0,84-0,90) | 1,12  (1,12-1,13) |
| Groningen | 0,90  (0,87-0,94) | 1,30  (1,18-1,42) | 0,90  (0,87-0,94) | | 1,31  (1,19-1,44) | 0,91  (0,87-0,94) | | 1,30  (1,18-1,42) | 0,91  (0,87-0,94) | 1,30  (1,18-1,42) | 0,91  (0,87-0,94) | 1,31  (1,19-1,44) |
| Gooi en Vechtstreek | 0,91  (0,87-0,95) | 1,06  (0,94-1,20) | 0,91  (0,87-0,95) | | 1,06  (0,94-1,20) | 0,91  (0,87-0,95) | | 1,06  (0,94-1,20) | 0,91  (0,87-0,95) | 1,06  (0,93-1,20) | 0,92  (0,88-0,96) | 1,06  (0,94-1,20) |
| Gelderland-Zuid | 0,91  (0,88-0,94) | 1,16  (1,06-1,27) | 0,91  (0,88-0,94) | | 1,16  (1,06-1,27) | 0,91  (0,88-0,94) | | 1,16  (1,06-1,27) | 0,91  (0,88-0,94) | 1,16  (1,06-1,27) | 0,91  (0,88-0,94) | 1,17  (1,07-1,27) |
| Gelderland-Midden | 0,88  (0,84-0,91) | 1,28  (1,15-1,43) | 0,88  (0,85-0,91) | | 1,29  (1,15-1,44) | 0,88  (0,84-0,91) | | 1,28  (1,15-1,43) | 0,87  (0,84-0,91) | 1,28  (1,15-1,43) | 0,88  (0,84-0,91) | 1,29  (1,16-1,44) |
| Friesland | 0,84  (0,82-0,87) | 1,28  (1,17-1,40) | 0,85  (0,82-0,87) | | 1,28  (1,18-1,40) | 0,85  (0,82-0,87) | | 1,28  (1,17-1,40) | 0,84  (0,82-0,87) | 1,28  (1,17-1,40) | 0,85  (0,82-0,87) | 1,29  (1,18-1,41) |
| Flevoland | 0,95  (0,88-1,01) | 0,92  (0,75-1,13) | 0,95  (0,88-1,01) | | 0,92  (0,75-1,14) | 0,95  (0,88-1,01) | | 0,92  (0,75-1,13) | 0,95  (0,88-1,01) | 0,92  (0,75-1,13) | 0,95  (0,89-1,02) | 0,93  (0,75-1,14) |
| Drenthe | 0,89  (0,85-0,93) | 1,10  (0,97-1,25) | 0,89  (0,85-0,93) | | 1,11  (0,98-1,25) | 0,89  (0,86-0,93) | | 1,10  (0,97-1,25) | 0,90  (0,86-0,94) | 1,10  (0,97-1,24) | 0,90  (0,86-0,93) | 1,11  (0,98-1,25) |
| Brabant-Zuidoost | 0,85  (0,82-0,87) | 1,16  (1,07-1,27) | 0,85  (0,83-0,88) | | 1,17  (1,07-1,27) | 0,85  (0,83-0,88) | | 1,16  (1,07-1,27) | 0,85  (0,82-0,87) | 1,17  (1,07-1,27) | 0,85  (0,83-0,88) | 1,17  (1,07-1,27) |
| Amsterdam | 0,88  (0,85-0,91) | 1,19  (1,08-1,31) | 0,88  (0,85-0,91) | | 1,21  (1,10-1,33) | 0,88  (0,85-0,92) | | 1,19  (1,08-1,31) | 0,88  (0,85-0,91) | 1,19  (1,08-1,31) | 0,89  (0,86-0,92) | 1,21  (1,10-1,33) |

IRR: Incidence Rate RatioModel 1: regio. Model 2: regio, demografie, en SES. Model 3a: regio, demografie, SES, leefstijl, eenzaamheid, zelfregie, en zelf-ervaren gezondheid. Model 3b: regio, demografie, SES en chronische ziekte. Model 3c: regio, demografie, SES en risico op angststoornis of depressie. Model 4: regio, demografie, SES, zelf-ervaren gezondheid, chronische ziekte en risico op angststoornis of depressie. Model 5a: regio, demografie, SES, zelf-ervaren gezondheid, chronische ziekte, risico op angststoornis of depressie, en leefstijl. Model 5b: regio, demografie, SES, zelf-ervaren gezondheid, chronische ziekte, risico op angststoornis of depressie en eenzaamheid. Model 5c: regio, demografie, SES, zelf-ervaren gezondheid, chronische ziekte, risico op angststoornis of depressie en zelfregie. Model 6 regio, demografie, SES, zelf-ervaren gezondheid, chronische ziekte, risico op angststoornis of depressie, leefstijl, eenzaamheid, en zelfregie. Register data: leeftijd, geslacht, migratie achtergrond en huishoudinkomen. Zelf-gerapporteerde data: burgerlijke staat, opleidingsniveau, moeite met rondkomen, zelf-ervaren gezondheid, chronische ziekte, risico op een angststoornis of depressie, leefstijl, eenzaamheid en zelfregie.

|  | | | | | | | | | | | | | | | | | | | | | |
| --- | --- | --- | --- | --- | --- | --- | --- | --- | --- | --- | --- | --- | --- | --- | --- | --- | --- | --- | --- | --- | --- |
|  |  | |  | |  | |  | |  | |  | |  | |  | |  | |  | |
|  |  |  |  |  |  |  |  |  |  |  |  |  |  |  |  |  |  |  |  |  |
|  |  | |  | |  | |  | |  | |  | |  | |  | |  | |  | |
|  |  |  |  |  |  |  |  |  |  |  |  |  |  |  |  |  |  |  |  |  |
|  |  |  |  |  |  |  |  |  |  |  |  |  |  |  |  |  |  |  |  |  |
|  |  |  |  |  |  |  |  |  |  |  |  |  |  |  |  |  |  |  |  |  |
|  |  |  |  |  |  |  |  |  |  |  |  |  |  |  |  |  |  |  |  |  |
|  |  |  |  |  |  |  |  |  |  |  |  |  |  |  |  |  |  |  |  |  |
|  |  |  |  |  |  |  |  |  |  |  |  |  |  |  |  |  |  |  |  |  |
|  |  |  |  |  |  |  |  |  |  |  |  |  |  |  |  |  |  |  |  |  |
|  |  |  |  |  |  |  |  |  |  |  |  |  |  |  |  |  |  |  |  |  |
|  |  |  |  |  |  |  |  |  |  |  |  |  |  |  |  |  |  |  |  |  |
|  |  |  |  |  |  |  |  |  |  |  |  |  |  |  |  |  |  |  |  |  |
|  |  |  |  |  |  |  |  |  |  |  |  |  |  |  |  |  |  |  |  |  |
|  |  |  |  |  |  |  |  |  |  |  |  |  |  |  |  |  |  |  |  |  |
|  |  |  |  |  |  |  |  |  |  |  |  |  |  |  |  |  |  |  |  |  |
|  |  |  |  |  |  |  |  |  |  |  |  |  |  |  |  |  |  |  |  |  |
|  |  |  |  |  |  |  |  |  |  |  |  |  |  |  |  |  |  |  |  |  |
|  |  |  |  |  |  |  |  |  |  |  |  |  |  |  |  |  |  |  |  |  |
|  |  |  |  |  |  |  |  |  |  |  |  |  |  |  |  |  |  |  |  |  |
|  |  |  |  |  |  |  |  |  |  |  |  |  |  |  |  |  |  |  |  |  |
|  |  |  |  |  |  |  |  |  |  |  |  |  |  |  |  |  |  |  |  |  |
|  |  |  |  |  |  |  |  |  |  |  |  |  |  |  |  |  |  |  |  |  |
|  |  |  |  |  |  |  |  |  |  |  |  |  |  |  |  |  |  |  |  |  |
|  |  |  |  |  |  |  |  |  |  |  |  |  |  |  |  |  |  |  |  |  |
|  |  |  |  |  |  |  |  |  |  |  |  |  |  |  |  |  |  |  |  |  |
|  |  |  |  |  |  |  |  |  |  |  |  |  |  |  |  |  |  |  |  |  |

| Tabel A5. Incidence Rate Ratios per GGD-regio voor GGZ kosten t.o.v. Zuid-Limburg. Resultaten van Zero-inflated negative binomial regressie modellen (n= 334,721). | | | | | | | | | | |
| --- | --- | --- | --- | --- | --- | --- | --- | --- | --- | --- |
| IRR (95%CI) | Model 1 | | Model 2 | | Model 3a | | Model 3b | | Model 3c | |
|  |  | Infl. |  | Infl. |  | Infl. |  | Infl. |  | Infl. |
| Zuid-Limburg | 1,00 (ref) | 1,00 (ref) | 1,00 (ref) | 1,00 (ref) | 1,00 (ref) | 1,00 (ref) | 1,00 (ref) | 1,00 (ref) | 1,00 (ref) | 1,00 (ref) |
| Zuid-Holland-Zuid | 0,47  (0,36-0,62) | 1,36  (1,09-1,68) | 0,54  (0,41-0,70) | 1,22  (0,98-1,53) | 0,54  (0,42-0,70) | 1,15  (0,92-1,44) | 0,57  (0,42-0,76) | 1,18  (0,94-1,47) | 0,51  (0,40-0,65) | 1,14  (0,91-1,42) |
| Zeeland | 0,90  (0,64-1,28) | 1,20  (0,98-1,46) | 0,92  (0,68-1,26) | 1,02  (0,83-1,24) | 0,92  (0,68-1,24) | 1,01  (0,82-1,24) | 0,90  (0,67-1,21) | 0,99  (0,81-1,22) | 0,85  (0,64-1,13) | 1,00  (0,81-1,22) |
| Zaanstreek-Waterland | 0,73  (0,57-0,95) | 1,19  (1,02-1,40) | 0,75  (0,60-0,94) | 1,10  (0,93-1,29) | 0,76  (0,61-0,95) | 1,04  (0,89-1,23) | 0,74  (0,60-0,91) | 1,09  (0,93-1,28) | 0,71  (0,57-0,89) | 1,06  (0,90-1,25) |
| West-Brabant | 1,15  (0,84-1,58) | 1,44  (1,20-1,72) | 1,12  (0,86-1,45) | 1,25  (1,04-1,50) | 1,14  (0,87-1,49) | 1,25  (1,04-1,50) | 1,14  (0,88-1,46) | 1,19  (0,99-1,43) | 1,05  (0,80-1,39) | 1,24  (1,03-1,49) |
| Utrecht | 0,78  (0,64-0,95) | 0,99  (0,88-1,12) | 0,84  (0,70-1,00) | 0,96  (0,84-1,09) | 0,84  (0,71-1,00) | 0,91  (0,80-1,04) | 0,86  (0,72-1,02) | 0,93  (0,82-1,06) | 0,83  (0,69-1,00) | 0,90  (0,79-1,03) |
| Twente | 0,73  (0,55-0,96) | 1,24  (1,00-1,54) | 0,70  (0,54-0,91) | 1,17  (0,94-1,44) | 0,71  (0,56-0,89) | 1,12  (0,90-1,39) | 0,71  (0,56-0,90) | 1,17  (0,95-1,45) | 0,72  (0,55-0,94) | 1,24  (1,01-1,53) |
| Rotterdam-Rijnmond | 0,91  (0,69-1,19) | 1,15  (1,01-1,32) | 0,89  (0,72-1,11) | 1,28  (1,11-1,47) | 0,94  (0,75-1,18) | 1,23  (1,07-1,42) | 0,90  (0,73-1,11) | 1,25  (1,08-1,43) | 0,90  (0,71-1,15) | 1,22  (1,06-1,41) |
| Noord- Oost- Gelderland | 0,86  (0,66-1,12) | 1,49  (1,27-1,74) | 0,93  (0,73-1,18) | 1,24  (1,06-1,47) | 0,91  (0,71-1,15) | 1,19  (1,01-1,40) | 0,96  (0,75-1,22) | 1,28  (1,08-1,51) | 0,93  (0,72-1,21) | 1,26  (1,06-1,49) |
| Limburg-Noord | 0,90  (0,66-1,22) | 1,43  (1,23-1,67) | 0,99  (0,74-1,34) | 1,23  (1,06-1,44) | 1,01  (0,73-1,40) | 1,20  (1,02-1,40) | 1,03  (0,75-1,42) | 1,22  (1,04-1,43) | 1,03  (0,74-1,43) | 1,17  (0,99-1,37) |
| Kennemerland | 0,78  (0,55-1,11) | 1,09  (0,93-1,28) | 0,80  (0,62-1,03) | 1,01  (0,86-1,18) | 0,80  (0,64-1,01) | 0,94  (0,80-1,11) | 0,81  (0,64-1,01) | 0,97  (0,82-1,14) | 0,77  (0,61-0,97) | 0,96  (0,81-1,13) |
| IJsselland | 0,76  (0,50-1,14) | 1,19  (0,96-1,49) | 0,79  (0,54-1,16) | 1,06  (0,85-1,33) | 0,77  (0,56-1,07) | 1,03  (0,83-1,29) | 0,78  (0,55-1,09) | 1,08  (0,87-1,35) | 0,76  (0,55-1,04) | 1,05  (0,84-1,31) |
| Hollands Noorden | 0,67  (0,52-0,86) | 1,16  (0,99-1,35) | 0,71  (0,56-0,90) | 1,07  (0,92-1,26) | 0,70  (0,56-0,87) | 1,04  (0,89-1,22) | 0,72  (0,57-0,91) | 1,04  (0,88-1,21) | 0,68  (0,54-0,86) | 1,04  (0,89-1,22) |
| Hollands Midden | 0,62  (0,50-0,77) | 1,13  (0,98-1,30) | 0,68  (0,55-0,82) | 1,03  (0,89-1,19) | 0,68  (0,56-0,81) | 0,98  (0,85-1,14) | 0,69  (0,57-0,83) | 1,05  (0,91-1,22) | 0,64  (0,52-0,78) | 1,03  (0,89-1,20) |
| Hart voor Brabant | 0,83  (0,58-1,17) | 1,39  (1,20-1,61) | 0,89  (0,65-1,23) | 1,24  (1,07-1,44) | 0,91  (0,67-1,25) | 1,23  (1,05-1,43) | 0,93  (0,68-1,29) | 1,21  (1,03-1,41) | 0,81  (0,61-1,07) | 1,24  (1,06-1,45) |
| Haaglanden | 0,75  (0,59-0,96) | 0,86  (0,74-1,00) | 0,77  (0,62-0,96) | 0,94  (0,81-1,09) | 0,82  (0,66-1,02) | 0,90  (0,78-1,05) | 0,78  (0,63-0,96) | 0,95  (0,81-1,10) | 0,77  (0,62-0,97) | 0,96  (0,82-1,12) |
| Groningen | 0,80  (0,63-1,03) | 0,99  (0,84-1,17) | 0,83  (0,66-1,03) | 1,09  (0,92-1,30) | 0,86  (0,68-1,08) | 1,04  (0,88-1,24) | 0,83  (0,67-1,03) | 1,11  (0,93-1,32) | 0,83  (0,66-1,05) | 0,99  (0,83-1,17) |
| Gooi en Vechtstreek | 0,70  (0,53-0,92) | 1,23  (1,01-1,50) | 0,74  (0,58-0,93) | 1,11  (0,91-1,35) | 0,74  (0,59-0,93) | 1,06  (0,87-1,30) | 0,77  (0,62-0,96) | 1,08  (0,88-1,33) | 0,70  (0,56-0,89) | 1,08  (0,87-1,32) |
| Gelderland-Zuid | 0,94  (0,60-1,46) | 1,02  (0,87-1,19) | 0,96  (0,67-1,39) | 1,00  (0,86-1,17) | 0,96  (0,70-1,32) | 0,95  (0,81-1,11) | 0,95  (0,69-1,31) | 0,98  (0,83-1,15) | 0,93  (0,68-1,27) | 1.00  (0,85-1,18) |
| Gelderland-Midden | 1,04  (0,73-1,48) | 1,25  (1,02-1,52) | 1,17  (0,78-1,76) | 1,19  (0,97-1,45) | 1,16  (0,81-1,67) | 1,16  (0,94-1,42) | 1,14  (0,80-1,64) | 1,22  (0,99-1,49) | 1,15  (0,72-1,84) | 1,25  (1,01-1,55) |
| Friesland | 0,74  (0,58-0,95) | 1,29  (1,09-1,52) | 0,78  (0,62-0,99) | 1,21  (1,02-1,43) | 0,79  (0,62-0,99) | 1,13  (0,96-1,34) | 0,77  (0,62-0,95) | 1,19  (1,00-1,41) | 0,76  (0,60-0,97) | 1,15  (0,97-1,37) |
| Flevoland | 0,71  (0,48-1,04) | 1,42  (1,03-1,97) | 0,77  (0,54-1,09) | 1,40  (1,00-1,98) | 0,79  (0,57-1,10) | 1,37  (0,96-1,97) | 0,78  (0,56-1,10) | 1,45  (1,02-2,08) | 0,74  (0,53-1,03) | 1,46  (1,00-2,11) |
| Drenthe | 0,95  (0,61-1,48) | 1,20  (0,94-1,52) | 0,93  (0,65-1,32) | 1,09  (0,86-1,39) | 0,93  (0,67-1,29) | 1,03  (0,80-1,31) | 0,94  (0,68-1,30) | 1,05  (0,82-1,34) | 0,90  (0,66-1,24) | 1,03  (0,81-1,32) |
| Brabant-Zuidoost | 0,89  (0,71-1,11) | 1,44  (1,22-1,70) | 0,98  (0,78-1,23) | 1,28  (1,08-1,51) | 1,03  (0,82-1,29) | 1,31  (1,10-1,55) | 1,05  (0,84-1,31) | 1,24  (1,04-1,47) | 0,98  (0,78-1,22) | 1,32  (1,11-1,57) |
| Amsterdam | 0,81  (0,64-1,02) | 0,71  (0,61-0,83) | 0,86  (0,70-1,07) | 0,86  (0,73-1,00) | 0,88  (0,72-1,08) | 0,77  (0,65-0,90) | 0,91  (0,74-1,11) | 0,80  (0,68-0,94) | 0,88  (0,71-1,09) | 0,78  (0,66-0,92) |

| Vervolg Tabel A5. | | | | | | | | | | | | |
| --- | --- | --- | --- | --- | --- | --- | --- | --- | --- | --- | --- | --- |
| IRR (95%CI) | Model 4 | | Model 5a | | Model 5b | | Model 5c | | | Model 6 | | |
|  |  | Infl. |  | Infl. |  | Infl. |  | Infl. | |  | Infl. |
| Zuid-Limburg | 1,00 (ref) | 1,00 (ref) | 1,00 (ref) | 1,00 (ref) | 1,00 (ref) | 1,00 (ref) | 1,00 (ref) | | 1,00 (ref) | 1,00 (ref) | 1,00 (ref) | |
| Zuid-Holland-Zuid | 0,54  (0,42-0,69) | 1,10  (0,88-1,38) | 0,53  (0,42-0,68) | 1,11  (0,88-1,39) | 0,54  (0,42-0,68) | 1,08  (0,86-1,36) | 0,54  (0,42-0,69) | 1,11  (0,88-1,40) | | 0,53  (0,42-0,68) | 1,10  (0,88-1,39) |
| Zeeland | 0,86  (0,65-1,14) | 0,96  (0,79-1,18) | 0,86  (0,65-1,12) | 0,96  (0,78-1,18) | 0,85  (0,64-1,13) | 0,98  (0,80-1,21) | 0,85  (0,64-1,13) | 0,99  (0,80-1,22) | | 0,85  (0,64-1,12) | 1,00  (0,81-1,24) |
| Zaanstreek-Waterland | 0,73  (0,59-0,90) | 1,04  (0,88-1,23) | 0,72  (0,58-0,88) | 1,05  (0,89-1,24) | 0,74  (0,59-0,91) | 1,01  (0,85-1,19) | 0,73  (0,59-0,90) | 1,03  (0,87-1,22) | | 0,73  (0,59-0,90) | 1,02  (0,86-1,21) |
| West-Brabant | 1,09  (0,84-1,43) | 1,20  (0,99-1,44) | 1,11  (0,85-1,45) | 1,19  (0,99-1,44) | 1,07  (0,83-1,39) | 1,19  (0,99-1,43) | 1,10  (0,84-1,44) | 1,19  (0,99-1,43) | | 1,10  (0,85-1,43) | 1,19  (0,99-1,43) |
| Utrecht | 0,85  (0,71-1,02) | 0,87  (0,76-0,99) | 0,85  (0,71-1,01) | 0,88  (0,77-1,00) | 0,86  (0,72-1,03) | 0,85  (0,74-0,97) | 0,86  (0,72-1,03) | 0,86  (0,75-0,98) | | 0,86  (0,72-1,03) | 0,85  (0,75-0,98) |
| Twente | 0,72  (0,57-0,92) | 1,19  (0,96-1,48) | 0,73  (0,57-0,93) | 1,20  (0,97-1,48) | 0,73  (0,57-0,93) | 1,15  (0,93-1,43) | 0,72  (0,57-0,92) | 1,17  (0,94-1,45) | | 0,73  (0,57-0,94) | 1,16  (0,93-1,43) |
| Rotterdam-Rijnmond | 0,93  (0,74-1,17) | 1,20  (1,04-1,38) | 0,93  (0,74-1,16) | 1,20  (1,04-1,39) | 0,93  (0,75-1,17) | 1,17  (1,01-1,35) | 0,94  (0,75-1,18) | 1,17  (1,02-1,36) | | 0,93  (0,75-1,16) | 1,16  (1,01-1,34) |
| Noord- Oost- Gelderland | 0,94  (0,73-1,22) | 1,25  (1,05-1,48) | 0,95  (0,73-1,24) | 1,25  (1,06-1,48) | 0,96  (0,74-1,26) | 1,22  (1,03-1,45) | 0,96  (0,74-1,25) | 1,25  (1,05-1,48) | | 0,97  (0,74-1,28) | 1,24  (1,05-1,47) |
| Limburg-Noord | 1,06  (0,75-1,50) | 1,16  (0,98-1,36) | 1,06  (0,75-1,49) | 1,16  (0,98-1,36) | 1,06  (0,75-1,48) | 1,16  (0,98-1,36) | 1,06  (0,76-1,47) | 1,15  (0,98-1,35) | | 1,05  (0,76-1,46) | 1,16  (0,98-1,37) |
| Kennemerland | 0,79  (0,63-0,98) | 0,91  (0,77-1,08) | 0,78  (0,63-0,96) | 0,92  (0,78-1,09) | 0,80  (0,64-1,00) | 0,89  (0,75-1,05) | 0,79  (0,64-0,98) | 0,89  (0,75-1,05) | | 0,79  (0,64-0,97) | 0,89  (0,75-1,05) |
| IJsselland | 0,76  (0,57-1,02) | 1,04  (0,84-1,30) | 0,74  (0,57-0,97) | 1,06  (0,85-1,32) | 0,78  (0,58-1,05) | 1,01  (0,81-1,26) | 0,76  (0,56-1,02) | 1,06  (0,85-1,33) | | 0,76  (0,58-0,99) | 1,05  (0,84-1,32) |
| Hollands Noorden | 0,69  (0,56-0,86) | 1,01  (0,86-1,19) | 0,69  (0,55-0,85) | 1,02  (0,87-1,20) | 0,70  (0,56-0,86) | 0,99  (0,84-1,16) | 0,70  (0,57-0,88) | 1,00  (0,85-1,17) | | 0,70  (0,56-0,87) | 0,99  (0,84-1,17) |
| Hollands Midden | 0,65  (0,54-0,79) | 1,02  (0,88-1,19) | 0,65  (0,54-0,79) | 1,02  (0,88-1,19) | 0,66  (0,55-0,80) | 1,00  (0,86-1,16) | 0,66  (0,55-0,80) | 1,05  (0,90-1,22) | | 0,66  (0,55-0,80) | 1,03  (0,89-1,20) |
| Hart voor Brabant | 0,87  (0,65-1,15) | 1,19  (1,02-1,39) | 0,86  (0,65-1,13) | 1,19  (1,02-1,40) | 0,88  (0,65-1,19) | 1,17  (1,00-1,37) | 0,84  (0,64-1,11) | 1,18  (1,00-1,38) | | 0,86  (0,65-1,13) | 1,17  (1,00-1,38) |
| Haaglanden | 0,80  (0,64-0,99) | 0,94  (0,80-1,10) | 0,79  (0,64-0,98) | 0,94  (0,80-1,11) | 0,79  (0,64-0,98) | 0,93  (0,79-1,09) | 0,79  (0,64-0,98) | 0,93  (0,79-1,09) | | 0,78  (0,63-0,97) | 0,93  (0,79-1,09) |
| Groningen | 0,85  (0,68-1,07) | 0,98  (0,83-1,17) | 0,85  (0,68-1,07) | 0,99  (0,83-1,18) | 0,85  (0,68-1,06) | 0,95  (0,80-1,13) | 0,86  (0,69-1,07) | 0,96  (0,80-1,14) | | 0,85  (0,68-1,07) | 0,95  (0,80-1,13) |
| Gooi en Vechtstreek | 0,74  (0,60-0,91) | 1,05  (0,85-1,29) | 0,74  (0,60-0,92) | 1,05  (0,85-1,30) | 0,74  (0,60-0,91) | 1,01  (0,81-1,24) | 0,75  (0,60-0,93) | 1,03  (0,83-1,28) | | 0,75  (0,60-0,92) | 1,01  (0,81-1,25) |
| Gelderland-Zuid | 0,94  (0,71-1,25) | 0,96  (0,81-1,13) | 0,91  (0,72-1,16) | 0,96  (0,81-1,14) | 0,93  (0,71-1,22) | 0,93  (0,79-1,10) | 0,95  (0,71-1,27) | 0,96  (0,81-1,13) | | 0,91  (0,72-1,15) | 0,95  (0,80-1,12) |
| Gelderland-Midden | 1,13  (0,76-1,70) | 1,23  (1,00-1,53) | 1,14  (0,75-1,73) | 1,25  (1,01-1,55) | 1,16  (0,76-1,77) | 1,22  (0,98-1,52) | 1,14  (0,75-1,74) | 1,24  (1,00-1,54) | | 1,17  (0,75-1,81) | 1,25  (1,00-1,55) |
| Friesland | 0,76  (0,61-0,95) | 1,11  (0,93-1,32) | 0,77  (0,62-0,97) | 1,12  (0,94-1,33) | 0,76  (0,61-0,95) | 1,09  (0,92-1,30) | 0,76  (0,61-0,96) | 1,09  (0,92-1,30) | | 0,77  (0,62-0,96) | 1,09  (0,92-1,30) |
| Flevoland | 0,78  (0,55-1,09) | 1,48  (1,01-2,19) | 0,78  (0,55-1,11) | 1,48  (1,00-2,18) | 0,78  (0,55-1,09) | 1,47  (0,99-2,17) | 0,79  (0,55-1,13) | 1,45  (0,99-2,12) | | 0,79  (0,55-1,13) | 1,44  (0,98-2,12) |
| Drenthe | 0,93  (0,69-1,25) | 0,98  (0,77-1,25) | 0,91  (0,67-1,24) | 0,99  (0,77-1,26) | 0,93  (0,68-1,26) | 0,96  (0,75-1,23) | 0,94  (0,69-1,26) | 0,95  (0,74-1,22) | | 0,92  (0,67-1,26) | 0,95  (0,75-1,22) |
| Brabant-Zuidoost | 1,04  (0,83-1,29) | 1,28  (1,07-1,52) | 1,05  (0,84-1,31) | 1,28  (1,07-1,52) | 1,05  (0,84-1,31) | 1,27  (1,06-1,52) | 1,05  (0,85-1,31) | 1,29  (1,08-1,54) | | 1,07  (0,86-1,33) | 1,30  (1,08-1,55) |
| Amsterdam | 0,91  (0,75-1,12) | 0,71  (0,60-0,85) | 0,90  (0,74-1,10) | 0,73  (0,62-0,86) | 0,93  (0,76-1,14) | 0,69  (0,58-0,81) | 0,92  (0,76-1,13) | 0,69  (0,59-0,82) | | 0,92  (0,75-1,12) | 0,70  (0,59-0,83) |

IRR: Incidence Rate Ratio. Model 1: regio. Model 2: regio, demografie, en SES. Model 3a: regio, demografie, SES, leefstijl, eenzaamheid, zelfregie, en zelf-ervaren gezondheid. Model 3b: regio, demografie, SES en chronische ziekte. Model 3c: regio, demografie, SES en risico op angststoornis of depressie. Model 4: regio, demografie, SES, zelf-ervaren gezondheid, chronische ziekte en risico op angststoornis of depressie. Model 5a: regio, demografie, SES, zelf-ervaren gezondheid, chronische ziekte, risico op angststoornis of depressie, en leefstijl. Model 5b: regio, demografie, SES, zelf-ervaren gezondheid, chronische ziekte, risico op angststoornis of depressie en eenzaamheid. Model 5c: regio, demografie, SES, zelf-ervaren gezondheid, chronische ziekte, risico op angststoornis of depressie en zelfregie. Model 6 regio, demografie, SES, zelf-ervaren gezondheid, chronische ziekte, risico op angststoornis of depressie, leefstijl, eenzaamheid, en zelfregie. Register data: leeftijd, geslacht, migratie achtergrond en huishoudinkomen. Zelf-gerapporteerde data: burgerlijke staat, opleidingsniveau, moeite met rondkomen, zelf-ervaren gezondheid, chronische ziekte, risico op een angststoornis of depressie, leefstijl, eenzaamheid en zelfregie.

|  | | | | | | | | | | | | | | | | | | | | | |
| --- | --- | --- | --- | --- | --- | --- | --- | --- | --- | --- | --- | --- | --- | --- | --- | --- | --- | --- | --- | --- | --- |
|  |  | |  | |  | |  | |  | |  | |  | |  | |  | |  | | |
|  |  |  |  |  |  |  |  |  |  |  |  |  |  |  |  |  |  |  |  |  |
|  |  | |  | |  | |  | |  | |  | |  | |  | |  | |  | |
|  |  |  |  |  |  |  |  |  |  |  |  |  |  |  |  |  |  |  |  |  |
|  |  |  |  |  |  |  |  |  |  |  |  |  |  |  |  |  |  |  |  |  |
|  |  |  |  |  |  |  |  |  |  |  |  |  |  |  |  |  |  |  |  |  |
|  |  |  |  |  |  |  |  |  |  |  |  |  |  |  |  |  |  |  |  |  |
|  |  |  |  |  |  |  |  |  |  |  |  |  |  |  |  |  |  |  |  |  |
|  |  |  |  |  |  |  |  |  |  |  |  |  |  |  |  |  |  |  |  |  |
|  |  |  |  |  |  |  |  |  |  |  |  |  |  |  |  |  |  |  |  |  |
|  |  |  |  |  |  |  |  |  |  |  |  |  |  |  |  |  |  |  |  |  |
|  |  |  |  |  |  |  |  |  |  |  |  |  |  |  |  |  |  |  |  |  |
|  |  |  |  |  |  |  |  |  |  |  |  |  |  |  |  |  |  |  |  |  |
|  |  |  |  |  |  |  |  |  |  |  |  |  |  |  |  |  |  |  |  |  |
|  |  |  |  |  |  |  |  |  |  |  |  |  |  |  |  |  |  |  |  |  |
|  |  |  |  |  |  |  |  |  |  |  |  |  |  |  |  |  |  |  |  |  |
|  |  |  |  |  |  |  |  |  |  |  |  |  |  |  |  |  |  |  |  |  |
|  |  |  |  |  |  |  |  |  |  |  |  |  |  |  |  |  |  |  |  |  |
|  |  |  |  |  |  |  |  |  |  |  |  |  |  |  |  |  |  |  |  |  |
|  |  |  |  |  |  |  |  |  |  |  |  |  |  |  |  |  |  |  |  |  |
|  |  |  |  |  |  |  |  |  |  |  |  |  |  |  |  |  |  |  |  |  |
|  |  |  |  |  |  |  |  |  |  |  |  |  |  |  |  |  |  |  |  |  |
|  |  |  |  |  |  |  |  |  |  |  |  |  |  |  |  |  |  |  |  |  |
|  |  |  |  |  |  |  |  |  |  |  |  |  |  |  |  |  |  |  |  |  |
|  |  |  |  |  |  |  |  |  |  |  |  |  |  |  |  |  |  |  |  |  |
|  |  |  |  |  |  |  |  |  |  |  |  |  |  |  |  |  |  |  |  |  |
|  |  |  |  |  |  |  |  |  |  |  |  |  |  |  |  |  |  |  |  |  |

| Tabel A6. Incidence Rate Ratios per GGD-regio voor farmaceutische kosten t.o.v. Zuid-Limburg. Resultaten van Zero-inflated negative binomial regressie modellen (n= 334,721). | | | | | | | | | | |
| --- | --- | --- | --- | --- | --- | --- | --- | --- | --- | --- |
| IRR (95%CI) | Model 1 | | Model 2 | | Model 3a | | Model 3b | | Model 3c | |
|  |  | Infl. |  | Infl. |  | Infl. |  | Infl. |  | Infl. |
| Zuid-Limburg | 1,00 (ref) | 1,00 (ref) | 1,00 (ref) | 1,00 (ref) | 1,00 (ref) | 1,00 (ref) | 1,00 (ref) | 1,00 (ref) | 1,00 (ref) | 1,00 (ref) |
| Zuid-Holland-Zuid | 1,12  (0,84-1,50) | 1,23  (1,08-1,40) | 1,17  (0,90-1,51) | 1,19  (1,04-1,35) | 1,18  (0,98-1,42) | 1,12  (0,99-1,26) | 1,19  (1,02-1,38) | 1,11  (0,99-1,24) | 1,20  (1,04-1,38) | 1,09  (0,97-1,22) |
| Zeeland | 1,05  (0,87-1,28) | 1,09  (0,97-1,24) | 1,11  (0,88-1,40) | 1,17  (1,03-1,33) | 1,15  (0,87-1,51) | 1,16  (1,03-1,31) | 1,31  (0,95-1,80) | 1,13  (1,00-1,26) | 1,30  (0,93-1,83) | 1,13  (1,01-1,27) |
| Zaanstreek-Waterland | 0,98  (0,87-1,11) | 1,30  (1,18-1,44) | 1,17  (0,97-1,40) | 1,33  (1,20-1,48) | 1,29  (1,03-1,63) | 1,29  (1,16-1,42) | 1,17  (0,95-1,44) | 1,32  (1,20-1,45) | 1,22  (0,98-1,51) | 1,30  (1,18-1,43) |
| West-Brabant | 1,03  (0,90-1,17) | 1,16  (1,04-1,29) | 1,21  (0,99-1,48) | 1,15  (1,03-1,29) | 1,20  (0,97-1,48) | 1,14  (1,03-1,27) | 1,20  (1,07-1,33) | 1,07  (0,96-1,18) | 1,18  (1,05-1,34) | 1,08  (0,98-1,19) |
| Utrecht | 0,88  (0,79-0,98) | 1,63  (1,50-1,77) | 1,00  (0,89-1,11) | 1,38  (1,27-1,50) | 1,04  (0,94-1,16) | 1,33  (1,23-1,44) | 1,04  (0,96-1,13) | 1,33  (1,23-1,44) | 1,06  (0,97-1,15) | 1,32  (1,22-1,42) |
| Twente | 0,83  (0,75-0,93) | 1,35  (1,21-1,50) | 0,88  (0,78-1,00) | 1,26  (1,12-1,41) | 0,95  (0,86-1,06) | 1,22  (1,10-1,35) | 0,96  (0,88-1,04) | 1,25  (1,13-1,39) | 0,98  (0,90-1,06) | 1,24  (1,12-1,38) |
| Rotterdam-Rijnmond | 1,10  (0,99-1,23) | 1,23  (1,12-1,34) | 1,23  (1,08-1,41) | 1,19  (1,09-1,30) | 1,27  (1,12-1,44) | 1,15  (1,06-1,25) | 1,18  (1,07-1,30) | 1,16  (1,07-1,26) | 1,20  (1,09-1,32) | 1,15  (1,06-1,25) |
| Noord- Oost- Gelderland | 0,95  (0,84-1,06) | 1,35  (1,23-1,49) | 1,05  (0,92-1,19) | 1,37  (1,24-1,51) | 1,15  (1,00-1,32) | 1,32  (1,20-1,44) | 1,10  (0,94-1,29) | 1,39  (1,27-1,52) | 1,13  (0,97-1,32) | 1,37  (1,25-1,50) |
| Limburg-Noord | 0,94  (0,86-1,02) | 1,06  (0,95-1,17) | 0,92  (0,83-1,01) | 1,09  (0,98-1,21) | 0,95  (0,86-1,05) | 1,07  (0,97-1,18) | 0,98  (0,91-1,05) | 1,08  (0,98-1,18) | 0,98  (0,91-1,06) | 1,07  (0,97-1,17) |
| Kennemerland | 0,85  (0,76-0,94) | 1,49  (1,35-1,65) | 0,93  (0,82-1,06) | 1,44  (1,30-1,59) | 1,02  (0,89-1,17) | 1,38  (1,25-1,51) | 1,05  (0,91-1,21) | 1,38  (1,26-1,52) | 1,08  (0,94-1,24) | 1,37  (1,25-1,50) |
| IJsselland | 0,88  (0,75-1,04) | 1,56  (1,39-1,75) | 1,03  (0,81-1,29) | 1,39  (1,23-1,57) | 1,03  (0,89-1,19) | 1,35  (1,21-1,51) | 1,00  (0,87-1,14) | 1,42  (1,27-1,58) | 1,00  (0,89-1,12) | 1,40  (1,26-1,56) |
| Hollands Noorden | 1,02  (0,88-1,19) | 1,70  (1,55-1,87) | 1,22  (0,98-1,53) | 1,74  (1,58-1,92) | 1,14  (0,94-1,39) | 1,65  (1,51-1,81) | 1,19  (0,92-1,54) | 1,64  (1,50-1,80) | 1,11  (0,94-1,32) | 1,62  (1,48-1,77) |
| Hollands Midden | 0,99  (0,82-1,19) | 1,45  (1,32-1,59) | 1,05  (0,89-1,24) | 1,32  (1,21-1,45) | 1,06  (0,94-1,21) | 1,27  (1,16-1,38) | 0,98  (0,89-1,09) | 1,34  (1,23-1,46) | 0,99  (0,91-1,09) | 1,32  (1,22-1,44) |
| Hart voor Brabant | 0,97  (0,84-1,12) | 1,34  (1,22-1,47) | 1,06  (0,89-1,25) | 1,28  (1,16-1,40) | 1,03  (0,90-1,18) | 1,26  (1,15-1,37) | 1,08  (0,97-1,19) | 1,22  (1,12-1,33) | 1,06  (0,96-1,16) | 1,22  (1,12-1,33) |
| Haaglanden | 0,95  (0,85-1,06) | 1,26  (1,13-1,39) | 1,06  (0,93-1,21) | 1,16  (1,04-1,28) | 1,13  (0,99-1,28) | 1,13  (1,02-1,24) | 1,01  (0,93-1,10) | 1,16  (1,06-1,28) | 1,04  (0,96-1,13) | 1,16  (1,05-1,27) |
| Groningen | 0,91  (0,82-1,00) | 1,53  (1,38-1,70) | 1,00  (0,86-1,16) | 1,37  (1,23-1,52) | 1,05  (0,93-1,18) | 1,32  (1,20-1,46) | 0,98  (0,89-1,08) | 1,39  (1,26-1,53) | 1,00  (0,92-1,10) | 1,38  (1,25-1,52) |
| Gooi en Vechtstreek | 1,20  (0,81-1,76) | 1,45  (1,26-1,66) | 1,41  (0,81-2,47) | 1,46  (1,27-1,67) | 1,19  (0,88-1,63) | 1,36  (1,20-1,53) | 1,17  (0,84-1,62) | 1,32  (1,17-1,49) | 1,12  (0,86-1,45) | 1,30  (1,15-1,47) |
| Gelderland-Zuid | 0,99  (0,88-1,11) | 1,53  (1,39-1,69) | 1,11  (0,96-1,28) | 1,38  (1,25-1,53) | 1,14  (1,00-1,30) | 1,33  (1,20-1,46) | 1,07  (0,97-1,18) | 1,33  (1,21-1,46) | 1,09  (0,99-1,20) | 1,32  (1,20-1,45) |
| Gelderland-Midden | 0,97  (0,84-1,11) | 1,51  (1,34-1,70) | 0,98  (0,87-1,12) | 1,39  (1,23-1,57) | 1,04  (0,91-1,19) | 1,34  (1,19-1,50) | 0,97  (0,89-1,06) | 1,40  (1,25-1,57) | 0,98  (0,89-1,08) | 1,38  (1,24-1,55) |
| Friesland | 1,00  (0,86-1,17) | 1,38  (1,25-1,53) | 1,05  (0,88-1,25) | 1,41  (1,27-1,56) | 1,10  (0,95-1,27) | 1,34  (1,21-1,47) | 1,03  (0,92-1,15) | 1,35  (1,23-1,48) | 1,05  (0,94-1,17) | 1,33  1,21-1,46) |
| Flevoland | 0,97  (0,77-1,23) | 1,31  (1,05-1,64) | 1,14  (0,86-1,51) | 1,16  (0,92-1,47) | 1,20  (0,85-1,68) | 1,14  (0,92-1,41) | 1,07  (0,89-1,27) | 1,18  (0,95-1,45) | 1,08  (0,89-1,32) | 1,17  (0,95-1,43) |
| Drenthe | 0,90  (0,75-1,08) | 1,21  (1,05-1,39) | 0,97  (0,76-1,23) | 1,27  (1,09-1,47) | 1,03  (0,87-1,22) | 1,21  (1,05-1,39) | 1,00  (0,87-1,15) | 1,23  (1,08-1,40) | 1,03  (0,91-1,17) | 1,21  (1,06-1,38) |
| Brabant-Zuidoost | 0,90  (0,82-0,98) | 1,34  (1,21-1,47) | 0,95  (0,85-1,07) | 1,28  (1,16-1,41) | 0,99  (0,87-1,12) | 1,29  (1,17-1,41) | 1,02  (0,94-1,12) | 1,21  (1,11-1,33) | 1,03  (0,92-1,14) | 1,24  (1,13-1,35) |
| Amsterdam | 1,26  (1,07-1,48) | 1,78  (1,60-1,97) | 1,33  (1,12-1,59) | 1,44  (1,29-1,60) | 1,46  (1,21-1,76) | 1,35  (1,22-1,50) | 1,24  (1,07-1,44) | 1,34  (1,22-1,48) | 1,30  (1,12-1,51) | 1,32  (1,20-1,46) |

| Vervolg Tabel A6. | | | | | | | | | | | |
| --- | --- | --- | --- | --- | --- | --- | --- | --- | --- | --- | --- |
| IRR (95%CI) | Model 4 | | Model 5a | | Model 5b | | Model 5c | | Model 6 | |
|  |  | Infl. |  | Infl. |  | Infl. |  | Infl. |  | Infl. |
| Zuid-Limburg | 1,00 (ref) | 1,00 (ref) | 1,00 (ref) | 1,00 (ref) | 1,00 (ref) | 1,00 (ref) | 1,00 (ref) | 1,00 (ref) | 1,00 (ref) | 1,00 (ref) |
| Zuid-Holland-Zuid | 1,20  (1,04-1,38) | 1,09  (0,97-1,22) | 1,20  (1,04-1,38) | 1,09  (0,97-1,23) | 1,20  (1,04-1,38) | 1,09  (0,97-1,23) | 1,19  (1,04-1,35) | 1,09  (0,97-1,22) | 1,19  (1,04-1,36) | 1,10  (0,98-1,23) |
| Zeeland | 1,30  (0,93-1,83) | 1,13  (1,01-1,27) | 1,32  (0,94-1,85) | 1,12  (1,00-1,26) | 1,30  (0,93-1,82) | 1,13  (1,01-1,27) | 1,29  (0,92-1,81) | 1,13  (1,01-1,27) | 1,31  (0,93-1,84) | 1,12  (1,00-1,26) |
| Zaanstreek-Waterland | 1,22  (0,98-1,51) | 1,30  (1,18-1,43) | 1,22  (0,99-1,51) | 1,30  (1,18-1,43) | 1,22  (0,98-1,51) | 1,31  (1,19-1,44) | 1,22  (0,98-1,53) | 1,30  (1,18-1,43) | 1,22  (0,98-1,51) | 1,31  (1,19-1,44) |
| West-Brabant | 1,18  (1,05-1,34) | 1,08  (0,98-1,19) | 1,20  (1,06-1,35) | 1,08  (0,97-1,19) | 1,18  (1,05-1,34) | 1,08  (0,98-1,19) | 1,18  (1,04-1,33) | 1,08  (0,98-1,19) | 1,19  (1,05-1,34) | 1,08  (0,98-1,19) |
| Utrecht | 1,06  (0,97-1,15) | 1,32  (1,22-1,42) | 1,07  (0,98-1,16) | 1,31  (1,21-1,41) | 1,06  (0,97-1,15) | 1,32  (1,23-1,43) | 1,05  (0,97-1,14) | 1,32  (1,22-1,42) | 1,06  (0,97-1,15) | 1,32  (1,22-1,42) |
| Twente | 0,98  (0,90-1,06) | 1,24  (1,12-1,38) | 0,99  (0,91-1,07) | 1,25  (1,13-1,38) | 0,98  (0,90-1,06) | 1,25  (1,13-1,39) | 0,98  (0,90-1,06) | 1,24  (1,12-1,38) | 0,98  (0,91-1,06) | 1,26  (1,13-1,39) |
| Rotterdam-Rijnmond | 1,20  (1,09-1,32) | 1,15  (1,06-1,25) | 1,21  (1,09-1,33) | 1,16  (1,07-1,26) | 1,20  (1,09-1,32) | 1,16  (1,06-1,25) | 1,20  (1,09-1,32) | 1,15  (1,06-1,25) | 1,20  (1,09-1,32) | 1,16  (1,07-1,26) |
| Noord- Oost- Gelderland | 1,13  (0,97-1,32) | 1,37  (1,25-1,50) | 1,14  (0,98-1,33) | 1,38  (1,26-1,51) | 1,13  (0,97-1,32) | 1,38  (1,26-1,51) | 1,13  (0,97-1,31) | 1,37  (1,25-1,50) | 1,13  (0,97-1,31) | 1,39  (1,27-1,51) |
| Limburg-Noord | 0,98  (0,91-1,06) | 1,07  (0,97-1,17) | 0,99  (0,92-1,07) | 1,07  (0,97-1,17) | 0,98  (0,91-1,06) | 1,07  (0,97-1,17) | 0,98  (0,91-1,06) | 1,07  (0,97-1,17) | 0,99  (0,91-1,07) | 1,06  (0,97-1,17) |
| Kennemerland | 1,08  (0,94-1,24) | 1,37  (1,25-1,50) | 1,09  (0,95-1,25) | 1,37  (1,24-1,50) | 1,08  (0,94-1,24) | 1,37  (1,25-1,51) | 1,08  (0,94-1,23) | 1,37  (1,25-1,50) | 1,08  (0,95-1,24) | 1,37  (1,25-1,51) |
| IJsselland | 1,00  (0,89-1,12) | 1,40  (1,26-1,56) | 1,01  (0,90-1,14) | 1,41  (1,26-1,57) | 1,00  (0,89-1,12) | 1,41  (1,26-1,57) | 0,99  (0,88-1,12) | 1,40  (1,25-1,56) | 1,01  (0,89-1,13) | 1,42  (1,27-1,59) |
| Hollands Noorden | 1,11  (0,94-1,32) | 1,62  (1,48-1,77) | 1,12  (0,94-1,34) | 1,62  (1,48-1,77) | 1,11  (0,94-1,32) | 1,63  (1,49-1,78) | 1,11  (0,94-1,33) | 1,62  (1,48-1,77) | 1,12  (0,94-1,34) | 1,63  (1,49-1,78) |
| Hollands Midden | 0,99  (0,91-1,09) | 1,32  (1,22-1,44) | 1,00  (0,92-1,10) | 1,33  (1,22-1,44) | 0,99  (0,91-1,09) | 1,33  (1,22-1,44) | 0,98  (0,90-1,07) | 1,32  (1,21-1,44) | 0,99  (0,90-1,08) | 1,33  (1,23-1,45) |
| Hart voor Brabant | 1,06  (0,96-1,16) | 1,22  (1,12-1,33) | 1,07  (0,97-1,17) | 1,22  (1,12-1,32) | 1,06  (0,96-1,16) | 1,23  (1,13-1,34) | 1,05  (0,96-1,16) | 1,22  (1,12-1,33) | 1,06  (0,97-1,17) | 1,22  (1,12-1,33) |
| Haaglanden | 1,04  (0,96-1,13) | 1,16  (1,05-1,27) | 1,05  (0,96-1,14) | 1,15  (1,05-1,27) | 1,04  (0,96-1,13) | 1,16  (1,05-1,28) | 1,04  (0,96-1,14) | 1,16  (1,05-1,27) | 1,05  (0,96-1,14) | 1,16  (1,05-1,27) |
| Groningen | 1,00  (0,92-1,10) | 1,38  (1,25-1,52) | 1,00  (0,92-1,10) | 1,39  (1,26-1,53) | 1,00  (0,92-1,10) | 1,38  (1,25-1,52) | 1,00  (0,91-1,10) | 1,38  (1,25-1,52) | 1,00  (0,91-1,09) | 1,39  (1,26-1,53) |
| Gooi en Vechtstreek | 1,12  (0,86-1,45) | 1,30  (1,15-1,47) | 1,14  (0,88-1,47) | 1,28  (1,13-1,44) | 1,12  (0,87-1,45) | 1,31  (1,16-1,48) | 1,14  (0,86-1,50) | 1,30  (1,15-1,47) | 1,15  (0,88-1,50) | 1,29  (1,14-1,46) |
| Gelderland-Zuid | 1,09  (0,99-1,20) | 1,32  (1,20-1,45) | 1,10  (0,99-1,21) | 1,31  (1,19-1,44) | 1,09  (0,99-1,20) | 1,33  (1,21-1,46) | 1,08  (0,98-1,19) | 1,32  (1,20-1,45) | 1,09  (0,99-1,20) | 1,32  (1,20-1,45) |
| Gelderland-Midden | 0,98  (0,89-1,08) | 1,38  (1,24-1,55) | 0,99  (0,90-1,09) | 1,39  (1,24-1,56) | 0,98  (0,89-1,08) | 1,39  (1,24-1,56) | 0,98  (0,89-1,07) | 1,38  (1,23-1,55) | 0,98  (0,89-1,08) | 1,39  (1,24-1,56) |
| Friesland | 1,05  (0,94-1,17) | 1,33  (1,21-1,46) | 1,06  (0,95-1,18) | 1,33  (1,21-1,46) | 1,05  (0,94-1,17) | 1,33  (1,21-1,47) | 1,05  (0,94-1,17) | 1,33  (1,21-1,46) | 1,06  (0,94-1,18) | 1,33  (1,21-1,47) |
| Flevoland | 1,08  (0,89-1,32) | 1,17  (0,95-1,43) | 1,09  (0,89-1,33) | 1,17  (0,95-1,44) | 1,08  (0,89-1,32) | 1,17  (0,95-1,44) | 1,08  (0,89-1,31) | 1,17  (0,95-1,43) | 1,08  (0,89-1,32) | 1,18  (0,95-1,45) |
| Drenthe | 1,03  (0,91-1,17) | 1,21  (1,06-1,38) | 1,04  (0,91-1,18) | 1,23  (1,08-1,40) | 1,03  (0,91-1,17) | 1,22  (1,07-1,39) | 1,03  (0,91-1,17) | 1,21  (1,06-1,38) | 1,03  (0,91-1,17) | 1,23  (1,08-1,41) |
| Brabant-Zuidoost | 1,03  (0,92-1,14) | 1,24  (1,13-1,35) | 1,04  (0,94-1,16) | 1,22  (1,12-1,34) | 1,03  (0,93-1,14) | 1,24  (1,13-1,35) | 1,02  (0,92-1,14) | 1,23  (1,13-1,35) | 1,04  (0,93-1,16) | 1,23  (1,12-1,34) |
| Amsterdam | 1,30  (1,12-1,51) | 1,32  (1,20-1,46) | 1,32  (1,13-1,53) | 1,33  (1,21-1,47) | 1,30  (1,12-1,51) | 1,33  (1,20-1,47) | 1,30  (1,12-1,50) | 1,32  (1,20-1,46) | 1,31  (1,13-1,53) | 1,34  (1,21-1,48) |

IRR: Incidence Rate RatioModel 1: regio. Model 2: regio, demografie, en SES. Model 3a: regio, demografie, SES, leefstijl, eenzaamheid, zelfregie, en zelf-ervaren gezondheid. Model 3b: regio, demografie, SES en chronische ziekte. Model 3c: regio, demografie, SES en risico op angststoornis of depressie. Model 4: regio, demografie, SES, zelf-ervaren gezondheid, chronische ziekte en risico op angststoornis of depressie. Model 5a: regio, demografie, SES, zelf-ervaren gezondheid, chronische ziekte, risico op angststoornis of depressie, en leefstijl. Model 5b: regio, demografie, SES, zelf-ervaren gezondheid, chronische ziekte, risico op angststoornis of depressie en eenzaamheid. Model 5c: regio, demografie, SES, zelf-ervaren gezondheid, chronische ziekte, risico op angststoornis of depressie en zelfregie. Model 6 regio, demografie, SES, zelf-ervaren gezondheid, chronische ziekte, risico op angststoornis of depressie, leefstijl, eenzaamheid, en zelfregie. Register data: leeftijd, geslacht, migratie achtergrond en huishoudinkomen. Zelf-gerapporteerde data: burgerlijke staat, opleidingsniveau, moeite met rondkomen, zelf-ervaren gezondheid, chronische ziekte, risico op een angststoornis of depressie, leefstijl, eenzaamheid en zelfregie.

|  | | | | | | | | | | | | | | | | | | | | |
| --- | --- | --- | --- | --- | --- | --- | --- | --- | --- | --- | --- | --- | --- | --- | --- | --- | --- | --- | --- | --- |
|  |  | |  |  | |  | |  | |  | |  | |  | |  | |  | |
|  |  |  |  |  |  |  |  |  |  |  |  |  |  |  |  |  |  |  |  |  |
|  |  | |  | |  | |  | |  | |  | |  | |  | |  | |  | |
|  |  |  |  |  |  |  |  |  |  |  |  |  |  |  |  |  |  |  |  |  |
|  |  |  |  |  |  |  |  |  |  |  |  |  |  |  |  |  |  |  |  |  |
|  |  |  |  |  |  |  |  |  |  |  |  |  |  |  |  |  |  |  |  |  |
|  |  |  |  |  |  |  |  |  |  |  |  |  |  |  |  |  |  |  |  |  |
|  |  |  |  |  |  |  |  |  |  |  |  |  |  |  |  |  |  |  |  |  |
|  |  |  |  |  |  |  |  |  |  |  |  |  |  |  |  |  |  |  |  |  |
|  |  |  |  |  |  |  |  |  |  |  |  |  |  |  |  |  |  |  |  |  |
|  |  |  |  |  |  |  |  |  |  |  |  |  |  |  |  |  |  |  |  |  |
|  |  |  |  |  |  |  |  |  |  |  |  |  |  |  |  |  |  |  |  |  |
|  |  |  |  |  |  |  |  |  |  |  |  |  |  |  |  |  |  |  |  |  |
|  |  |  |  |  |  |  |  |  |  |  |  |  |  |  |  |  |  |  |  |  |
|  |  |  |  |  |  |  |  |  |  |  |  |  |  |  |  |  |  |  |  |  |
|  |  |  |  |  |  |  |  |  |  |  |  |  |  |  |  |  |  |  |  |  |
|  |  |  |  |  |  |  |  |  |  |  |  |  |  |  |  |  |  |  |  |  |
|  |  |  |  |  |  |  |  |  |  |  |  |  |  |  |  |  |  |  |  |  |
|  |  |  |  |  |  |  |  |  |  |  |  |  |  |  |  |  |  |  |  |  |
|  |  |  |  |  |  |  |  |  |  |  |  |  |  |  |  |  |  |  |  |  |
|  |  |  |  |  |  |  |  |  |  |  |  |  |  |  |  |  |  |  |  |  |
|  |  |  |  |  |  |  |  |  |  |  |  |  |  |  |  |  |  |  |  |  |
|  |  |  |  |  |  |  |  |  |  |  |  |  |  |  |  |  |  |  |  |  |
|  |  |  |  |  |  |  |  |  |  |  |  |  |  |  |  |  |  |  |  |  |
|  |  |  |  |  |  |  |  |  |  |  |  |  |  |  |  |  |  |  |  |  |
|  |  |  |  |  |  |  |  |  |  |  |  |  |  |  |  |  |  |  |  |  |
|  |  |  |  |  |  |  |  |  |  |  |  |  |  |  |  |  |  |  |  |  |

| Tabel A7. Incidence Rate Ratios per GGD-regio voor medisch-specialistische kosten t.o.v. Zuid-Limburg. Resultaten van Zero-inflated negative binomial regressies (n= 334,721). | | | | | | | | | | |
| --- | --- | --- | --- | --- | --- | --- | --- | --- | --- | --- |
| IRR (95%CI) | Model 1 | | Model 2 | | Model 3a | | Model 3b | | Model 3c | |
|  |  | Infl. |  | Infl. |  | Infl. |  | Infl. |  | Infl. |
| Zuid-Limburg | 1,00 (ref) | 1,00 (ref) | 1,00 (ref) | 1,00 (ref) | 1,00 (ref) | 1,00 (ref) | 1,00 (ref) | 1,00 (ref) | 1,00 (ref) | 1,00 (ref) |
| Zuid-Holland-Zuid | 0,83  (0,75-0,91) | 1,15  (1,04-1,26) | 0,83  (0,75-0,91) | 1,12  (1,01-1,23) | 0,92  (0,84-1,00) | 1,07  (0,96-1,18) | 0,91  (0,84-1,00) | 1,07  (0,97-1,18) | 0,84  (0,76-0,93) | 1,11  (1,00-1,22) |
| Zeeland | 0,88  (0,80-0,97) | 1,01  (0,92-1,10) | 0,87  (0,79-0,96) | 1,09  (0,98-1,20) | 0,92  (0,83-1,01) | 1,08  (0,98-1,20) | 0,95  (0,86-1,04) | 1,04  (0,94-1,15) | 0,88  (0,80-0,97) | 1,09  (0,98-1,20) |
| Zaanstreek-Waterland | 0,97  (0,88-1,07) | 1,08  (1,00-1,17) | 1,00  (0,91-1,10) | 1,08  (0,99-1,18) | 1,03  (0,95-1,12) | 1,04  (0,96-1,13) | 1,02  (0,94-1,10) | 1,08  (0,99-1,17) | 1,00  (0,91-1,10) | 1,08  (0,99-1,17) |
| West-Brabant | 0,88  (0,81-0,97) | 1,02  (0,94-1,11) | 0,92  (0,83-1,01) | 1,02  (0,93-1,12) | 0,93  (0,85-1,02) | 1,01  (0,93-1,11) | 0,95  (0,87-1,02) | 0,95  (0,87-1,04) | 0,92  (0,83-1,02) | 1,02  (0,93-1,12) |
| Utrecht | 0,90  (0,83-0,98) | 1,32  (1,25-1,41) | 0,97  (0,89-1,06) | 1,16  (1,09-1,24) | 1,03  (0,95-1,12) | 1,13  (1,05-1,20) | 1,02  (0,94-1,10) | 1,13  (1,05-1,21) | 0,98  (0,90-1,07) | 1,16  (1,08-1,24) |
| Twente | 1,02  (0,86-1,20) | 1,13  (1,04-1,22) | 1,05  (0,89-1,25) | 1,05  (0,96-1,15) | 1,07  (0,96-1,20) | 1,01  (0,92-1,11) | 1,03  (0,92-1,17) | 1,04  (0,94-1,14) | 1,07  (0,90-1,26) | 1,06  (0,97-1,16) |
| Rotterdam-Rijnmond | 0,95  (0,87-1,03) | 1,10  (1,03-1,17) | 1,03  (0,94-1,14) | 1,04  (0,97-1,12) | 1,09  (1,01-1,19) | 1,01  (0,94-1,09) | 1,06  (0,98-1,15) | 1,03  (0,96-1,11) | 1,04  (0,94-1,14) | 1,03  (0,96-1,11) |
| Noord- Oost- Gelderland | 0,94  (0,86-1,02) | 1,19  (1,11-1,28) | 0,95  (0,87-1,04) | 1,22  (1,13-1,31) | 1,01  (0,94-1,10) | 1,17  (1,09-1,27) | 0,96  (0,88-1,03) | 1,24  (1,15-1,34) | 0,96  (0,87-1,05) | 1,22  (1,13-1,32) |
| Limburg-Noord | 0,99  (0,89-1,12) | 0,96  (0,89-1,04) | 1,03  (0,89-1,20) | 1,00  (0,92-1,08) | 1,07  (0,90-1,26) | 0,97  (0,89-1,05) | 1,02  (0,92-1,13) | 0,97  (0,89-1,06) | 1,04  (0,89-1,21) | 0,99  (0,91-1,08) |
| Kennemerland | 0,92  (0,84-1,02) | 1,16  (1,08-1,26) | 0,97  (0,87-1,07) | 1,13  (1,04-1,23) | 1,07  (0,96-1,19) | 1,08  (1,00-1,18) | 1,03  (0,95-1,12) | 1,09  (1,00-1,19) | 0,98  (0,88-1,09) | 1,13  (1,04-1,22) |
| IJsselland | 1,02  (0,92-1,14) | 1,40  (1,28-1,53) | 1,08  (0,97-1,20) | 1,27  (1,15-1,40) | 1,16  (1,05-1,29) | 1,24  (1,13-1,37) | 1,07  (0,97-1,17) | 1,31  (1,18-1,44) | 1,09  (0,97-1,21) | 1,27  (1,15-1,40) |
| Hollands Noorden | 0,88  (0,80-0,96) | 1,31  (1,22-1,41) | 0,89  (0,81-0,99) | 1,35  (1,24-1,46) | 0,92  (0,85-1,01) | 1,31  (1,21-1,41) | 0,92  (0,84-1,00) | 1,31  (1,21-1,42) | 0,90  (0,82-1,00) | 1,34  (1,24-1,46) |
| Hollands Midden | 0,92  (0,84-1,00) | 1,23  (1,15-1,32) | 0,96  (0,88-1,05) | 1,17  (1,08-1,25) | 1,00  (0,93-1,09) | 1,12  (1,04-1,21) | 0,94  (0,87-1,02) | 1,19  (1,11-1,29) | 0,96  (0,88-1,06) | 1,17  (1,09-1,26) |
| Hart voor Brabant | 0,94  (0,80-1,11) | 1,07  (1,00-1,15) | 1,03  (0,82-1,30) | 1,03  (0,96-1,12) | 1,13  (0,86-1,49) | 1,03  (0,95-1,11) | 1,02  (0,88-1,19) | 0,99  (0,92-1,07) | 1,05  (0,82-1,33) | 1,03  (0,96-1,12) |
| Haaglanden | 0,99  (0,89-1,10) | 1,05  (0,98-1,14) | 1,07  (0,96-1,19) | 0,95  (0,88-1,04) | 1,15  (1,03-1,29) | 0,93  (0,85-1,01) | 1,09  (0,99-1,19) | 0,97  (0,89-1,05) | 1,07  (0,96-1,20) | 0,96  (0,88-1,05) |
| Groningen | 0,93  (0,83-1,04) | 1,41  (1,31-1,53) | 0,98  (0,87-1,11) | 1,28  (1,17-1,39) | 1,02  (0,91-1,14) | 1,24  (1,14-1,35) | 0,98  (0,87-1,09) | 1,31  (1,20-1,43) | 1,00  (0,88-1,13) | 1,27  (1,16-1,38) |
| Gooi en Vechtstreek | 0,95  (0,85-1,07) | 1,15  (1,04-1,27) | 0,97  (0,85-1,10) | 1,18  (1,06-1,31) | 1,07  (0,94-1,22) | 1,13  (1,02-1,26) | 0,99  (0,90-1,10) | 1,12  (1,01-1,25) | 0,98  (0,86-1,10) | 1,17  (1,06-1,30) |
| Gelderland-Zuid | 1,02  (0,89-1,17) | 1,38  (1,28-1,49) | 1,10  (0,93-1,31) | 1,28  (1,18-1,39) | 1,14  (0,95-1,38) | 1,23  (1,14-1,34) | 1,06  (0,95-1,19) | 1,25  (1,15-1,36) | 1,09  (0,94-1,25) | 1,28  (1,18-1,39) |
| Gelderland-Midden | 0,88  (0,79-0,97) | 1,22  (1,11-1,34) | 0,90  (0,81-1,01) | 1,15  (1,04-1,27) | 0,98  (0,87-1,10) | 1,11  (1,01-1,23) | 0,94  (0,85-1,04) | 1,17  (1,06-1,29) | 0,91  (0,81-1,01) | 1,16  (1,05-1,28) |
| Friesland | 0,94  (0,84-1,05) | 1,33  (1,24-1,44) | 0,96  (0,84-1,10) | 1,38  (1,27-1,50) | 1,05  (0,92-1,21) | 1,32  (1,22-1,43) | 0,98  (0,89-1,09) | 1,35  (1,24-1,47) | 0,98  (0,85-1,12) | 1,37  (1,27-1,49) |
| Flevoland | 0,86  (0,74-0,99) | 1,11  (0,94-1,31) | 0,91  (0,79-1,05) | 0,97  (0,80-1,18) | 0,99  (0,85-1,15) | 0,95  (0,78-1,15) | 0,92  (0,80-1,06) | 0,98  (0,81-1,20) | 0,91  (0,79-1,05) | 0,97  (0,80-1,18) |
| Drenthe | 0,89  (0,77-1,04) | 1,10  (0,99-1,23) | 0,89  (0,76-1,03) | 1,16  (1,03-1,30) | 0,97  (0,86-1,10) | 1,11  (0,99-1,24) | 0,95  (0,84-1,08) | 1,13  (1,00-1,27) | 0,90  (0,77-1,05) | 1,15  (1,02-1,29) |
| Brabant-Zuidoost | 0,96  (0,88-1,05) | 1,09  (1,01-1,17) | 0,99  (0,89-1,10) | 1,05  (0,97-1,14) | 0,98  (0,90-1,06) | 1,06  (0,98-1,14) | 1,02  (0,94-1,11) | 1,01  (0,93-1,09) | 0,99  (0,89-1,10) | 1,06  (0,98-1,14) |
| Amsterdam | 0,93  (0,81-1,07) | 1,33  (1,23-1,44) | 1,08  (0,91-1,28) | 1,10  (1,01-1,21) | 1,10  (0,98-1,23) | 1,04  (0,95-1,14) | 1,10  (0,96-1,26) | 1,05  (0,96-1,15) | 1,06  (0,92-1,23) | 1,09  (0,99-1,19) |

| Vervolg Tabel A7. | | | | | | | | | | | | |
| --- | --- | --- | --- | --- | --- | --- | --- | --- | --- | --- | --- | --- |
| IRR (95%CI) | Model 4 | | Model 5a | | Model 5b | | Model 5c | | | Model 6 | | |
|  |  | Infl. |  | Infl. |  | Infl. |  | | Infl. |  | Infl. |
| Zuid-Limburg | 1,00 (ref) | 1,00 (ref) | 1,00 (ref) | 1,00 (ref) | 1,00 (ref) | 1,00 (ref) | 1,00 (ref) | 1,00 (ref) | | 1,00 (ref) | 1,00 (ref) |
| Zuid-Holland-Zuid | 0,95  (0,87-1,03) | 1,05  (0,95-1,16) | 0,95  (0,87-1,03) | 1,05  (0,95-1,17) | 0,95  (0,87-1,03) | 1,05  (0,95-1,17) | 0,95  (0,87-1,03) | | 1,05  (0,95-1,16) | 0,94  (0,87-1,02) | 1,06  (0,96-1,17) |
| Zeeland | 0,95  (0,87-1,05) | 1,05  (0,95-1,16) | 0,97  (0,89-1,07) | 1,05  (0,95-1,16) | 0,96  (0,87-1,05) | 1,05  (0,95-1,16) | 0,94  (0,86-1,03) | | 1,05  (0,95-1,16) | 0,96  (0,88-1,06) | 1,05  (0,95-1,16) |
| Zaanstreek-Waterland | 1,03  (0,95-1,12) | 1,06  (0,97-1,15) | 1,04  (0,97-1,13) | 1,06  (0,97-1,16) | 1,02  (0,95-1,11) | 1,07  (0,98-1,16) | 1,03  (0,96-1,12) | | 1,06  (0,97-1,15) | 1,03  (0,96-1,11) | 1,07  (0,98-1,17) |
| West-Brabant | 0,94  (0,87-1,02) | 0,97  (0,88-1,06) | 0,95  (0,88-1,03) | 0,97  (0,88-1,06) | 0,94  (0,87-1,02) | 0,97  (0,88-1,06) | 0,94  (0,87-1,01) | | 0,96  (0,88-1,06) | 0,94  (0,87-1,01) | 0,97  (0,89-1,06) |
| Utrecht | 1,05  (0,96-1,13) | 1,12  (1,04-1,20) | 1,05  (0,97-1,14) | 1,12  (1,05-1,20) | 1,04  (0,96-1,13) | 1,12  (1,05-1,20) | 1,04  (0,96-1,13) | | 1,12  (1,04-1,20) | 1,04  (0,96-1,13) | 1,13  (1,05-1,21) |
| Twente | 1,05  (0,95-1,17) | 1,02  (0,93-1,12) | 1,07  (0,97-1,19) | 1,03  (0,94-1,13) | 1,05  (0,95-1,17) | 1,03  (0,94-1,13) | 1,05  (0,95-1,17) | | 1,02  (0,93-1,12) | 1,06  (0,96-1,18) | 1,04  (0,94-1,14) |
| Rotterdam-Rijnmond | 1,09  (1,01-1,18) | 1,02  (0,94-1,09) | 1,10  (1,02-1,19) | 1,02  (0,95-1,10) | 1,09  (1,01-1,18) | 1,02  (0,95-1,10) | 1,09  (1,01-1,18) | | 1,02  (0,94-1,09) | 1,09  (1,01-1,18) | 1,02  (0,95-1,10) |
| Noord- Oost- Gelderland | 0,99  (0,92-1,07) | 1,22  (1,13-1,32) | 1,00  (0,93-1,08) | 1,23  (1,13-1,33) | 0,98  (0,91-1,06) | 1,22  (1,13-1,33) | 0,99  (0,92-1,06) | | 1,22  (1,12-1,32) | 0,98  (0,91-1,05) | 1,23  (1,14-1,34) |
| Limburg-Noord | 1,05  (0,93-1,18) | 0,96  (0,89-1,05) | 1,06  (0,94-1,20) | 0,97  (0,89-1,05) | 1,04  (0,93-1,17) | 0,96  (0,89-1,05) | 1,04  (0,93-1,18) | | 0,96  (0,89-1,05) | 1,05  (0,93-1,18) | 0,97  (0,89-1,05) |
| Kennemerland | 1,07  (0,98-1,17) | 1,07  (0,99-1,17) | 1,09  (0,99-1,19) | 1,08  (1,00-1,18) | 1,07  (0,98-1,17) | 1,08  (0,99-1,17) | 1,07  (0,98-1,17) | | 1,07  (0,99-1,17) | 1,08  (0,99-1,18) | 1,09  (1,00-1,18) |
| IJsselland | 1,12  (1,01-1,23) | 1,29  (1,17-1,42) | 1,12  (1,02-1,23) | 1,30  (1,18-1,44) | 1,11  (1,01-1,22) | 1,30  (1,17-1,43) | 1,11  (1,01-1,22) | | 1,29  (1,17-1,42) | 1,1  (1,01-1,21) | 1,31  (1,19-1,45) |
| Hollands Noorden | 0,93  (0,86-1,01) | 1,30  (1,20-1,41) | 0,95  (0,87-1,03) | 1,30  (1,20-1,41) | 0,93  (0,86-1,00) | 1,30  (1,20-1,41) | 0,94  (0,87-1,02) | | 1,30  (1,20-1,41) | 0,95  (0,88-1,03) | 1,31  (1,21-1,42) |
| Hollands Midden | 0,98  (0,91-1,05) | 1,17  (1,08-1,26) | 0,99  (0,92-1,06) | 1,18  (1,09-1,27) | 0,97  (0,90-1,05) | 1,17  (1,09-1,26) | 0,97  (0,90-1,04) | | 1,17  (1,08-1,26) | 0,97  (0,90-1,04) | 1,18  (1,10-1,27) |
| Hart voor Brabant | 1,07  (0,89-1,30) | 1,00  (0,92-1,08) | 1,07  (0,90-1,26) | 1,00  (0,92-1,08) | 1,07  (0,89-1,29) | 1,00  (0,93-1,08) | 1,08  (0,88-1,32) | | 1,00  (0,92-1,08) | 1,06  (0,89-1,26) | 1,00  (0,93-1,08) |
| Haaglanden | 1,13  (1,03-1,24) | 0,95  (0,87-1,04) | 1,15  (1,04-1,26) | 0,96  (0,88-1,04) | 1,13  (1,03-1,24) | 0,96  (0,88-1,04) | 1,13  (1,03-1,24) | | 0,95  (0,87-1,04) | 1,15  (1,04-1,27) | 0,96  (0,88-1,05) |
| Groningen | 1,00  (0,90-1,12) | 1,29  (1,19-1,41) | 1,01  (0,91-1,13) | 1,30  (1,20-1,42) | 1,00  (0,89-1,11) | 1,30  (1,19-1,42) | 1,00  (0,90-1,12) | | 1,29  (1,19-1,41) | 1,00  (0,90-1,11) | 1,31  (1,20-1,43) |
| Gooi en Vechtstreek | 1,04  (0,94-1,16) | 1,11  (1,00-1,23) | 1,05  (0,94-1,18) | 1,10  (0,99-1,22) | 1,03  (0,93-1,15) | 1,12  (1,00-1,24) | 1,05  (0,94-1,17) | | 1,11  (1,00-1,23) | 1,04  (0,93-1,16) | 1,11  (1,00-1,23) |
| Gelderland-Zuid | 1,11  (0,96-1,27) | 1,24  (1,14-1,35) | 1,12  (0,97-1,30) | 1,24  (1,14-1,34) | 1,10  (0,96-1,26) | 1,24  (1,14-1,35) | 1,11  (0,96-1,27) | | 1,24  (1,14-1,34) | 1,11  (0,96-1,30) | 1,24  (1,14-1,35) |
| Gelderland-Midden | 0,98  (0,88-1,08) | 1,15  (1,04-1,27) | 0,99  (0,89-1,09) | 1,16  (1,05-1,28) | 0,97  (0,88-1,07) | 1,16  (1,05-1,28) | 0,98  (0,88-1,09) | | 1,15  (1,04-1,27) | 0,98  (0,88-1,08) | 1,16  (1,05-1,29) |
| Friesland | 1,03  (0,93-1,15) | 1,33  (1,22-1,44) | 1,04  (0,94-1,15) | 1,33  (1,23-1,45) | 1,02  (0,92-1,13) | 1,33  (1,23-1,45) | 1,03  (0,93-1,14) | | 1,33  (1,22-1,44) | 1,03  (0,93-1,13) | 1,34  (1,23-1,45) |
| Flevoland | 0,96  (0,83-1,11) | 0,97  (0,79-1,18) | 0,97  (0,84-1,11) | 0,97  (0,80-1,19) | 0,96  (0,83-1,11) | 0,97  (0,80-1,19) | 0,97  (0,84-1,12) | | 0,97  (0,79-1,18) | 0,97  (0,83-1,12) | 0,98  (0,80-1,19) |
| Drenthe | 0,99  (0,88-1,11) | 1,11  (0,99-1,25) | 1,00  (0,89-1,12) | 1,12  (0,99-1,26) | 0,99  (0,88-1,11) | 1,12  (0,99-1,26) | 0,99  (0,88-1,11) | | 1,11  (0,99-1,25) | 0,99  (0,89-1,11) | 1,12  (1,00-1,26) |
| Brabant-Zuidoost | 1,01  (0,93-1,09) | 1,02  (0,94-1,11) | 1,03  (0,95-1,11) | 1,02  (0,94-1,11) | 1,00  (0,93-1,08) | 1,03  (0,95-1,11) | 1,00  (0,92-1,08) | | 1,02  (0,94-1,11) | 1,01  (0,93-1,09) | 1,02  (0,95-1,11) |
| Amsterdam | 1,12  (1,00-1,25) | 1,03  (0,94-1,13) | 1,14  (1,01-1,27) | 1,04  (0,95-1,14) | 1,11  (0,99-1,25) | 1,03  (0,94-1,13) | 1,12  (1,00-1,25) | | 1,03  (0,94-1,13) | 1,13  (1.00-1,27) | 1,05  (0,96-1,15) |

IRR: Incidence Rate RatioModel 1: regio. Model 2: regio, demografie, en SES. Model 3a: regio, demografie, SES, leefstijl, eenzaamheid, zelfregie, en zelf-ervaren gezondheid. Model 3b: regio, demografie, SES en chronische ziekte. Model 3c: regio, demografie, SES en risico op angststoornis of depressie. Model 4: regio, demografie, SES, zelf-ervaren gezondheid, chronische ziekte en risico op angststoornis of depressie. Model 5a: regio, demografie, SES, zelf-ervaren gezondheid, chronische ziekte, risico op angststoornis of depressie, en leefstijl. Model 5b: regio, demografie, SES, zelf-ervaren gezondheid, chronische ziekte, risico op angststoornis of depressie en eenzaamheid. Model 5c: regio, demografie, SES, zelf-ervaren gezondheid, chronische ziekte, risico op angststoornis of depressie en zelfregie. Model 6 regio, demografie, SES, zelf-ervaren gezondheid, chronische ziekte, risico op angststoornis of depressie, leefstijl, eenzaamheid, en zelfregie. Register data: leeftijd, geslacht, migratie achtergrond en huishoudinkomen. Zelf-gerapporteerde data: burgerlijke staat, opleidingsniveau, moeite met rondkomen, zelf-ervaren gezondheid, chronische ziekte, risico op een angststoornis of depressie, leefstijl, eenzaamheid en zelfregie.

| **Tabel A8. Verklaring significante regionale verschillen in Huisartsconsultkosten door toevoeging van leefstijl, eenzaamheid, en zelfregie (model t.o.v. model 6).** | | | | | | | |
| --- | --- | --- | --- | --- | --- | --- | --- |
|  | Model 4 | | Model 6 | | verschil tussen model 4 en 6 | gemiddeld aantal 19-plussers in 2017* | Toe- of afname regionale verschillen in kosten |
| GGD-regio | marginale kosten | verschil met ref | marginale kosten | verschil met ref |
| Zuid-Limburg | 47,98 | (ref) | € 47,86 | (ref) |  |  |  |
| Zuid-Holland Zuid | € 42,61 | € 5,37 | € 42,41 | € 5,45 | € 0,08 | 334.140 | € 26.346,94 |
| Zeeland | € 39,21 | € 8,77 | € 38,99 | € 8,87 | € 0,10 | 306.222 | € 30.282,29 |
| Zaanstreek Waterland | € 42,61 | € 5,37 | € 42,54 | € 5,32 | € -0,05 | 264.893 | -€ 12.638,05 |
| West Brabant | € 38,84 | € 9,14 | € 38,73 | € 9,13 | € -0,01 | 562.773 | -€ 7.203,49 |
| Utrecht | € 41,16 | € 6,82 | € 41,23 | € 6,63 | € -0,19 | 666.844 | -€ 127.840,66 |
| Twente | € 36,71 | € 11,27 | € 36,78 | € 11,08 | € -0,19 | 494.646 | -€ 93.859,08 |
| Rotterdam-Rijnmond | € 37,55 | € 10,43 | € 37,57 | € 10,29 | € -0,14 | 1.033.491 | -€ 148.636,68 |
| Noord en Oost Gelderland | € 37,92 | € 10,06 | € 37,82 | € 10,04 | € -0,02 | 649.777 | -€ 13.002,04 |
| Limburg-Noord | € 44,02 | € 3,96 | € 43,97 | € 3,89 | € -0,07 | 421.842 | -€ 29.621,75 |
| Kennemerland | € 41,58 | € 6,40 | € 41,72 | € 6,14 | € -0,26 | 421.650 | -€ 109.430,82 |
| IJsselland | € 39,04 | € 8,94 | € 38,89 | € 8,97 | € 0,03 | 403.397 | € 11.258,81 |
| Hollands Noorden | € 38,80 | € 9,18 | € 39,01 | € 8,85 | € -0,33 | 518.725 | -€ 170.183,30 |
| Hollands Midden | € 40,03 | € 7,95 | € 39,80 | € 8,06 | € 0,11 | 551.554 | € 61.277,65 |
| Hart voor Brabant | € 43,74 | € 4,24 | € 43,88 | € 3,98 | € -0,26 | 843.239 | -€ 219.958,89 |
| Haaglanden | € 32,89 | € 15,09 | € 32,92 | € 14,94 | € -0,15 | 860.697 | -€ 132.194,45 |
| Groningen | € 41,70 | € 6,28 | € 41,73 | € 6,13 | € -0,15 | 475.810 | -€ 73.545,95 |
| Gooi- en Vechtstreek | € 43,18 | € 4,80 | € 43,48 | € 4,37 | € -0,43 | 197.886 | -€ 84.410,25 |
| Gelderland Zuid | € 42,73 | € 5,25 | € 42,68 | € 5,18 | € -0,07 | 440.023 | -€ 31.611,25 |
| Gelderland Midden | € 40,59 | € 7,39 | € 40,45 | € 7,41 | € 0,02 | 537.356 | € 9.618,67 |
| Fryslan | € 39,12 | € 8,86 | € 39,07 | € 8,78 | € -0,08 | 511.208 | -€ 38.524,63 |
| Drenthe | € 42,20 | € 5,78 | € 42,25 | € 5,60 | € -0,18 | 391.288 | -€ 69.023,20 |
| Brabant Zuidoost | € 39,87 | € 8,11 | € 39,98 | € 7,88 | € -0,23 | 601.197 | -€ 139.736,22 |
| Amsterdam | € 41,20 | € 6,78 | € 41,36 | € 6,50 | € -0,28 | 847.533 | -€ 239.097,53 |
| Totaal |  |  |  |  |  |  | -€ 1.601.733,89 |

Model 4: regio, demografie, SES, zelf-ervaren gezondheid, chronische ziekte en risico op angststoornis of depressie. Model 6 regio, demografie, SES, zelf-ervaren gezondheid, chronische ziekte, risico op angststoornis of depressie, leefstijl, eenzaamheid, en zelfregie. Register data: leeftijd, geslacht, migratie achtergrond en huishoudinkomen. Zelf-gerapporteerde data: burgerlijke staat, opleidingsniveau, moeite met rondkomen, zelf-ervaren gezondheid, chronische ziekte, risico op een angststoornis of depressie, leefstijl, eenzaamheid en zelfregie. * gebaseerd op gegevens CBS Statline (opendata.cbs.nl)

| **Tabel A9. Verklaring significante regionale verschillen in GGZ-kosten door toevoeging van leefstijl, eenzaamheid, en zelfregie (model t.o.v. model 6).** | | | | | | | |
| --- | --- | --- | --- | --- | --- | --- | --- |
|  | Model 4 | | Model 6 | | verschil tussen model 4 en 6 | gemiddeld aantal 19-plussers in 2017 | afname regionale verschillen in kosten |
| GGD-regio | marginale kosten | verschil met ref | marginale kosten | verschil met ref |
| Zuid-Limburg | € 215,39 | (ref) | € 212,84 | (ref) |  |  |  |
| Twente | € 135,08 | € 80,31 | € 138,40 | € 74,44 | -€ 5,87 | 494.646 | -€ 2.903.572,02 |
| Hollands Midden | € 138,53 | € 76,86 | € 137,70 | € 75,14 | -€ 1,72 | 551.554 | -€ 948.672,88 |
| Zuid Holland Zuid | € 107,34 | € 108,05 | € 105,40 | € 107,44 | -€ 0,61 | 334.140 | -€ 203.825,40 |
| Totaal |  |  |  |  |  |  | -€ 4.056.070,30 |

Model 4: regio, demografie, SES, zelf-ervaren gezondheid, chronische ziekte en risico op angststoornis of depressie. Model 6 regio, demografie, SES, zelf-ervaren gezondheid, chronische ziekte, risico op angststoornis of depressie, leefstijl, eenzaamheid, en zelfregie. Register data: leeftijd, geslacht, migratie achtergrond en huishoudinkomen. Zelf-gerapporteerde data: burgerlijke staat, opleidingsniveau, moeite met rondkomen, zelf-ervaren gezondheid, chronische ziekte, risico op een angststoornis of depressie, leefstijl, eenzaamheid en zelfregie. * gebaseerd op gegevens CBS Statline (opendata.cbs.nl)

**Figuur A1. Marginale kosten van regio voor huisartsconsultkosten op basis van ongecorrigeerde (model 1) en volledige gecorrigeerde kosten (model 6)**

*Model 1 kijkt alleen naar regio. Model 6 is gecorrigeerd voor regio, demografie, SES, algemene en geestelijke gezondheid, leefstijl, eenzaamheid en zelfregie. Register data: leeftijd, geslacht, migratie achtergrond en huishoudinkomen. Zelf-gerapporteerde data: burgerlijke staat, opleidingsniveau, moeite met rondkomen, zelf-ervaren gezondheid, chronische ziekte, risico op een angststoornis of depressie, leefstijl, eenzaamheid en zelfregie.

**Figuur A2. Marginale kosten van regio voor GGZ kosten op basis van ongecorrigeerde (model 1) en volledige gecorrigeerde kosten (model 6)**

*Model 1 kijkt alleen naar regio. Model 6 is gecorrigeerd voor regio, demografie, SES, algemene en geestelijke gezondheid, leefstijl, eenzaamheid en zelfregie. Register data: leeftijd, geslacht, migratie achtergrond en huishoudinkomen. Zelf-gerapporteerde data: burgerlijke staat, opleidingsniveau, moeite met rondkomen, zelf-ervaren gezondheid, chronische ziekte, risico op een angststoornis of depressie, leefstijl, eenzaamheid en zelfregie.

**Figuur A3. Marginale kosten van regio voor farmacie kosten op basis van ongecorrigeerde (model 1) en volledige gecorrigeerde kosten (model 6)**

*Model 1 kijkt alleen naar regio. Model 6 is gecorrigeerd voor regio, demografie, SES, algemene en geestelijke gezondheid, leefstijl, eenzaamheid en zelfregie. Register data: leeftijd, geslacht, migratie achtergrond en huishoudinkomen. Zelf-gerapporteerde data: burgerlijke staat, opleidingsniveau, moeite met rondkomen, zelf-ervaren gezondheid, chronische ziekte, risico op een angststoornis of depressie,, leefstijl, eenzaamheid en zelfregie.

.

**Figuur A4. Marginale kosten van regio voor medisch specialistische kosten op basis van ongecorrigeerde (model 1) en volledige gecorrigeerde kosten (model 6)**

*Model 1 kijkt alleen naar regio. Model 6 is gecorrigeerd voor regio, demografie, SES, algemene en geestelijke gezondheid, leefstijl, eenzaamheid en zelfregie. Register data: leeftijd, geslacht, migratie achtergrond en huishoudinkomen. Zelf-gerapporteerde data: burgerlijke staat, opleidingsniveau, moeite met rondkomen, zelf-ervaren gezondheid, chronische ziekte, risico op een angststoornis of depressie, leefstijl, eenzaamheid en zelfregie.
